# Supplementary material for: Convergent evolution of hexenal isomerases in Lepidoptera and plants
Source: Nat Ecol Evol. 2026 Feb 27;10(4):807–19. doi: 10.1038/s41559-026-02999-2 (PMC13076199; doi:10.1038/s41559-026-02999-2)
Supplement: Supplementary file 4 — Sequence sources and quality assessment of lepidopteran datasets used for phylogenetic analysis. [file 41559_2026_2999_MOESM4_ESM.xlsx]

## Sheet: S1A
Species	Superfamily	Accession Number	BUSCO	Total GMC Gene No.	HI Gene No.	HI homologs in putative Hi clade	Note
Drosophila melanogaster	Ephydroidea	GCA_000001215.4	C:99.6%[S:98.9%,D:0.7%],F:0.1%,M:0.3%,n:1367	14	0	-	Fruit fly
Cheumatopsyche charites	Hydropsychoidea	GCA_024721215.1	C:98.5%[S:98.2%,D:0.3%],F:0.7%,M:0.8%,n:1367	17	0	-	Caddisfly
Athripsodes cinereus	Leptoceroidea	GCA_947579605.1	C:97.4%[S:95.9%,D:1.5%],F:1.2%,M:1.4%,n:1367	27	0	-	Caddisfly
Glyphotaelius pellucidus	Limnephiloidea	GCA_936435175.1	C:95.0%[S:94.1%,D:0.9%],F:2.8%,M:2.2%,n:1367	15	0	-	Caddisfly
Micropterix aruncella	Micropterigoidea	GCA_944548615.1	C:97.7%[S:96.0%,D:1.7%],F:1.0%,M:1.3%,n:1367	25	0	-
Phymatopus californicus	Hepialoidea	GEOO00000000.1	C:92.6%[S:71.0%,D:21.6%],F:2.9%,M:4.5%,n:1367	9	0	-
Triodia sylvina	Hepialoidea	GAVB00000000.2	C:76.1%[S:71.1%,D:5.0%],F:7.8%,M:16.1%,n:1367	10	0	-
Tischeria quercitella	Tischerioidea	GENO00000000.1	C:76.5%[S:19.9%,D:56.6%],F:11.6%,M:11.9%,n:1367	21	0	-
Palaephatus luteolus	Palaephatoidea	GEON00000000.1	C:94.9%[S:68.3%,D:26.6%],F:1.4%,M:3.7%,n:1367	11	0	-
Ptyssoptera sp. AB-2015	Palaephatoidea	GERG00000000.1	C:91.1%[S:63.4%,D:27.7%],F:3.3%,M:5.6%,n:1367	15	0	-
Luffia ferchaultella	Tineoidea	GCA_949709985.1	C:98.6%[S:97.9%,D:0.7%],F:0.4%,M:1.0%,n:1367	22	0	-
Tinea trinotella	Tineoidea	GCA_905220615.1	C:98.8%[S:98.1%,D:0.7%],F:0.4%,M:0.8%,n:1367	19	0	-
Plutella xylostella	Yponomeutoidea	GCA_932276165.1	C:99.3%[S:98.8%,D:0.5%],F:0.1%,M:0.6%,n:1367	44	0	-
Yponomeuta cagnagella	Yponomeutoidea	GCA_947310995.1	C:98.6%[S:98.4%,D:0.2%],F:0.6%,M:0.8%,n:1367	39	0	-
Carposina sasakii	Copromorphoidea	GCA_014607495.2	C:98.4%[S:96.0%,D:2.4%],F:0.7%,M:0.9%,n:1367	33	0	-
Archips xylosteana	Tortricoidea	GCA_947563465.1	C:99.0%[S:98.4%,D:0.6%],F:0.4%,M:0.6%,n:1367	48	3	BRAKERIALP00005014395.1,BRAKERIALP00005014519.1,BRAKERIALP00005014683.1
Cydia amplana	Tortricoidea	GCA_948474715.1	C:99.1%[S:98.5%,D:0.6%],F:0.4%,M:0.5%,n:1367	45	2	BRAKERNAPP00005016708.1,BRAKERNAPP00005017296.1
Bembecia ichneumoniformis	Sesioidea	GCA_910589475.2	C:99.1%[S:98.2%,D:0.9%],F:0.4%,M:0.5%,n:1367	22	0	-
Choreutis nemorana	Sesioidea	GCA_949316135.1	C:99.3%[S:98.9%,D:0.4%],F:0.2%,M:0.5%,n:1367	36	0	-
Apoda limacodes	Zygaenoidea	GCA_946406115.1	C:99.2%[S:99.0%,D:0.2%],F:0.4%,M:0.4%,n:1367	82	4	BRAKERLAPP00005002081.1,BRAKERLAPP00005010473.1,BRAKERLAPP00005010490.1,BRAKERLAPP00005010829.1
Zygaena filipendulae	Zygaenoidea	GCA_907165275.2	C:99.0%[S:98.1%,D:0.9%],F:0.3%,M:0.7%,n:1367	27	2	ENSZFIP00015000348.1,ENSZFIP00015000935.1
Zeuzera pyrina	Cossoidea	GCA_907165235.1	C:99.2%[S:99.0%,D:0.2%],F:0.3%,M:0.5%,n:1367	40	1	BRAKERZPYP00000021146.1
Danaus plexippus plexippus	Papilionoidea	GCA_009731565.1	C:98.7%[S:98.2%,D:0.5%],F:0.7%,M:0.6%,n:1367	30	3	ENSDPXP00005004708.1,ENSDPXP00005005379.1,ENSDPXP00005027252.1
Pieris rapae	Papilionoidea	GCA_905147795.1	C:98.6%[S:98.2%,D:0.4%],F:0.2%,M:1.2%,n:1367	28	1	ENSPRPP00005026259.1
Agonopterix subpropinquella	Gelechioidea	GCA_922987775.1	C:99.2%[S:98.5%,D:0.7%],F:0.4%,M:0.4%,n:1367	66	17	BRAKERASQP00005000229.1,BRAKERASQP00005003931.1,BRAKERASQP00005003937.1,BRAKERASQP00005004137.1,BRAKERASQP00005006212.1,BRAKERASQP00005007863.1,BRAKERASQP00005008000.1,BRAKERASQP00005008019.1,BRAKERASQP00005008080.1,BRAKERASQP00005008165.1,BRAKERASQP00005008267.1,BRAKERASQP00005008287.1,BRAKERASQP00005008368.1,BRAKERASQP00005009169.1,BRAKERASQP00005010454.1,BRAKERASQP00005010595.1,BRAKERASQP00005…
Anarsia innoxiella	Gelechioidea	GCA_947563765.1	C:98.8%[S:98.0%,D:0.8%],F:0.3%,M:0.9%,n:1367	39	2	BRAKERRRLP00005004827.1,BRAKERRRLP00005009811.1
Emmelina monodactyla	Pterophoroidea	GCA_916618145.1	C:99.0%[S:98.3%,D:0.7%],F:0.1%,M:0.9%,n:1367	26	1	ENSEMNP00005017129.1
Marasmarcha lunaedactyla	Pterophoroidea	GCA_923062675.1	C:99.2%[S:98.5%,D:0.7%],F:0.4%,M:0.4%,n:1367	37	0	-
Chilo suppressalis	Pyraloidea	GCA_902850365.1	C:98.9%[S:98.2%,D:0.7%],F:0.5%,M:0.6%,n:1367	23	2	CAH0398093.1,CAH2980541.1
Galleria mellonella	Pyraloidea	GCA_003640425.2	C:92.1%[S:91.9%,D:0.2%],F:5.3%,M:2.6%,n:1367	36	8	XP_026749602.1,XP_026749639.1,XP_026759445.1,XP_026763613.2,XP_031764483.1,XP_031765752.1,XP_031765753.1,XP_031765765.1
Achlya flavicornis	Drepanoidea	GCA_947623365.1	C:99.1%[S:98.7%,D:0.4%],F:0.3%,M:0.6%,n:1367	39	9	BRAKERYRHP00005002222.1,BRAKERYRHP00005005468.1,BRAKERYRHP00005009424.1,BRAKERYRHP00005010607.1,BRAKERYRHP00005010628.1,BRAKERYRHP00005010656.1,BRAKERYRHP00005010676.1,BRAKERYRHP00005014631.1,BRAKERYRHP00005015102.1
Drepana falcataria	Drepanoidea	GCA_945859725.1	C:99.1%[S:98.5%,D:0.6%],F:0.5%,M:0.4%,n:1367	21	1	ENSDFAP00010008125.1
Chloridea virescens	Noctuoidea	GCA_002382865.1	C:89.7%[S:88.1%,D:1.6%],F:2.2%,M:8.1%,n:1367	40	12	PCG65132.1,PCG65227.1,PCG69794.1,PCG70657.1,PCG74381.1,PCG74382.1,PCG75661.1,PCG76355.1,PCG76483.1,PCG79619.1,PCG79620.1,PCG79621.1
Spodoptera frugiperda	Noctuoidea	GCA_011064685.2	C:94.4%[S:78.1%,D:16.3%],F:0.7%,M:4.9%,n:1367	80	26	XP_035432750.1,XP_035432751.1,XP_035433036.1,XP_035433319.1,XP_035434758.1,XP_035434762.1,XP_035434764.1,XP_035435060.1,XP_035435546.1,XP_035435556.1,XP_035435557.1,XP_035435558.1,XP_035435559.1,XP_035437887.1,XP_035442956.1,XP_035450442.1,XP_035450607.1,XP_035450608.1,XP_035450611.1,XP_035450613.1,XP_035451172.1,XP_035451173.1,XP_035451174.1,XP_035451211.1,XP_035451444.1,XP_035456054.1
Macaria notata	Geometroidea	GCA_927399415.1	C:99.1%[S:98.2%,D:0.9%],F:0.4%,M:0.5%,n:1367	32	2	BRAKERMONP00005000164.1,BRAKERMONP00005010978.1
Operophtera brumata	Geometroidea	GCA_932527175.1	C:97.7%[S:96.4%,D:1.3%],F:0.9%,M:1.4%,n:1367	33	3	ENSOBRP00005018085.1,ENSOBRP00005025744.1,ENSOBRP00005037276.1
Bombyx mori	Bombycoidea	GCF_030269925.1	C:99.0%[S:98.7%,D:0.3%],F:0.3%,M:0.7%,n:1367	46	6	NP_001177919.1,XP_021204350.1,XP_021209119.1,XP_037872749.1,XP_037873585.2,XP_037873722.1
Manduca sexta	Bombycoidea	GCA_014839805.1	C:98.2%[S:89.6%,D:8.6%],F:0.5%,M:1.3%,n:1367	51	9	XP_030020891.1,XP_030029851.1,XP_030035814.1,XP_030035816.2,XP_030036004.1,XP_030036014.1,XP_030036407.1,XP_030037989.1,XP_037294969.1

## Sheet: S1B
Species	Accession Number
Achlya flavicornis	BRAKERYRHP00005000050.1
Achlya flavicornis	BRAKERYRHP00005002219.1
Achlya flavicornis	BRAKERYRHP00005002222.1
Achlya flavicornis	BRAKERYRHP00005002557.1
Achlya flavicornis	BRAKERYRHP00005002610.1
Achlya flavicornis	BRAKERYRHP00005002758.1
Achlya flavicornis	BRAKERYRHP00005002972.1
Achlya flavicornis	BRAKERYRHP00005003625.1
Achlya flavicornis	BRAKERYRHP00005005129.1
Achlya flavicornis	BRAKERYRHP00005005468.1
Achlya flavicornis	BRAKERYRHP00005005665.1
Achlya flavicornis	BRAKERYRHP00005006336.1
Achlya flavicornis	BRAKERYRHP00005007747.1
Achlya flavicornis	BRAKERYRHP00005007854.1
Achlya flavicornis	BRAKERYRHP00005007857.1
Achlya flavicornis	BRAKERYRHP00005007863.1
Achlya flavicornis	BRAKERYRHP00005008002.1
Achlya flavicornis	BRAKERYRHP00005008062.1
Achlya flavicornis	BRAKERYRHP00005008078.1
Achlya flavicornis	BRAKERYRHP00005008105.1
Achlya flavicornis	BRAKERYRHP00005008146.1
Achlya flavicornis	BRAKERYRHP00005008151.1
Achlya flavicornis	BRAKERYRHP00005008194.1
Achlya flavicornis	BRAKERYRHP00005008205.1
Achlya flavicornis	BRAKERYRHP00005008209.1
Achlya flavicornis	BRAKERYRHP00005008256.1
Achlya flavicornis	BRAKERYRHP00005009424.1
Achlya flavicornis	BRAKERYRHP00005009748.1
Achlya flavicornis	BRAKERYRHP00005009943.1
Achlya flavicornis	BRAKERYRHP00005010607.1
Achlya flavicornis	BRAKERYRHP00005010628.1
Achlya flavicornis	BRAKERYRHP00005010656.1
Achlya flavicornis	BRAKERYRHP00005010676.1
Achlya flavicornis	BRAKERYRHP00005013089.1
Achlya flavicornis	BRAKERYRHP00005014631.1
Achlya flavicornis	BRAKERYRHP00005015102.1
Achlya flavicornis	BRAKERYRHP00005015248.1
Achlya flavicornis	BRAKERYRHP00005016364.1
Achlya flavicornis	BRAKERYRHP00005016487.1
Agonopterix subpropinquella	BRAKERASQP00005000111.1
Agonopterix subpropinquella	BRAKERASQP00005000229.1
Agonopterix subpropinquella	BRAKERASQP00005000299.1
Agonopterix subpropinquella	BRAKERASQP00005000483.1
Agonopterix subpropinquella	BRAKERASQP00005000707.1
Agonopterix subpropinquella	BRAKERASQP00005000867.1
Agonopterix subpropinquella	BRAKERASQP00005000909.1
Agonopterix subpropinquella	BRAKERASQP00005000943.1
Agonopterix subpropinquella	BRAKERASQP00005001107.1
Agonopterix subpropinquella	BRAKERASQP00005001688.1
Agonopterix subpropinquella	BRAKERASQP00005003464.1
Agonopterix subpropinquella	BRAKERASQP00005003931.1
Agonopterix subpropinquella	BRAKERASQP00005003937.1
Agonopterix subpropinquella	BRAKERASQP00005004137.1
Agonopterix subpropinquella	BRAKERASQP00005004731.1
Agonopterix subpropinquella	BRAKERASQP00005005108.1
Agonopterix subpropinquella	BRAKERASQP00005005396.1
Agonopterix subpropinquella	BRAKERASQP00005006091.1
Agonopterix subpropinquella	BRAKERASQP00005006212.1
Agonopterix subpropinquella	BRAKERASQP00005006954.1
Agonopterix subpropinquella	BRAKERASQP00005006988.1
Agonopterix subpropinquella	BRAKERASQP00005006989.1
Agonopterix subpropinquella	BRAKERASQP00005007030.1
Agonopterix subpropinquella	BRAKERASQP00005007094.1
Agonopterix subpropinquella	BRAKERASQP00005007111.1
Agonopterix subpropinquella	BRAKERASQP00005007180.1
Agonopterix subpropinquella	BRAKERASQP00005007227.1
Agonopterix subpropinquella	BRAKERASQP00005007265.1
Agonopterix subpropinquella	BRAKERASQP00005007290.1
Agonopterix subpropinquella	BRAKERASQP00005007319.1
Agonopterix subpropinquella	BRAKERASQP00005007370.1
Agonopterix subpropinquella	BRAKERASQP00005007387.1
Agonopterix subpropinquella	BRAKERASQP00005007392.1
Agonopterix subpropinquella	BRAKERASQP00005007484.1
Agonopterix subpropinquella	BRAKERASQP00005007539.1
Agonopterix subpropinquella	BRAKERASQP00005007597.1
Agonopterix subpropinquella	BRAKERASQP00005007734.1
Agonopterix subpropinquella	BRAKERASQP00005007763.1
Agonopterix subpropinquella	BRAKERASQP00005007781.1
Agonopterix subpropinquella	BRAKERASQP00005007854.1
Agonopterix subpropinquella	BRAKERASQP00005007863.1
Agonopterix subpropinquella	BRAKERASQP00005007948.1
Agonopterix subpropinquella	BRAKERASQP00005008000.1
Agonopterix subpropinquella	BRAKERASQP00005008019.1
Agonopterix subpropinquella	BRAKERASQP00005008080.1
Agonopterix subpropinquella	BRAKERASQP00005008165.1
Agonopterix subpropinquella	BRAKERASQP00005008267.1
Agonopterix subpropinquella	BRAKERASQP00005008287.1
Agonopterix subpropinquella	BRAKERASQP00005008368.1
Agonopterix subpropinquella	BRAKERASQP00005008410.1
Agonopterix subpropinquella	BRAKERASQP00005008623.1
Agonopterix subpropinquella	BRAKERASQP00005008666.1
Agonopterix subpropinquella	BRAKERASQP00005008884.1
Agonopterix subpropinquella	BRAKERASQP00005008892.1
Agonopterix subpropinquella	BRAKERASQP00005009005.1
Agonopterix subpropinquella	BRAKERASQP00005009067.1
Agonopterix subpropinquella	BRAKERASQP00005009169.1
Agonopterix subpropinquella	BRAKERASQP00005009176.1
Agonopterix subpropinquella	BRAKERASQP00005009216.1
Agonopterix subpropinquella	BRAKERASQP00005009267.1
Agonopterix subpropinquella	BRAKERASQP00005009288.1
Agonopterix subpropinquella	BRAKERASQP00005010454.1
Agonopterix subpropinquella	BRAKERASQP00005010595.1
Agonopterix subpropinquella	BRAKERASQP00005012081.1
Agonopterix subpropinquella	BRAKERASQP00005014284.1
Agonopterix subpropinquella	BRAKERASQP00005016202.1
Anarsia innoxiella	BRAKERRRLP00005001984.1
Anarsia innoxiella	BRAKERRRLP00005002170.1
Anarsia innoxiella	BRAKERRRLP00005002197.1
Anarsia innoxiella	BRAKERRRLP00005002230.1
Anarsia innoxiella	BRAKERRRLP00005002371.1
Anarsia innoxiella	BRAKERRRLP00005002531.1
Anarsia innoxiella	BRAKERRRLP00005004080.1
Anarsia innoxiella	BRAKERRRLP00005004827.1
Anarsia innoxiella	BRAKERRRLP00005005728.1
Anarsia innoxiella	BRAKERRRLP00005005831.1
Anarsia innoxiella	BRAKERRRLP00005006144.1
Anarsia innoxiella	BRAKERRRLP00005006203.1
Anarsia innoxiella	BRAKERRRLP00005006263.1
Anarsia innoxiella	BRAKERRRLP00005006268.1
Anarsia innoxiella	BRAKERRRLP00005006326.1
Anarsia innoxiella	BRAKERRRLP00005006335.1
Anarsia innoxiella	BRAKERRRLP00005006377.1
Anarsia innoxiella	BRAKERRRLP00005006380.1
Anarsia innoxiella	BRAKERRRLP00005006420.1
Anarsia innoxiella	BRAKERRRLP00005006507.1
Anarsia innoxiella	BRAKERRRLP00005006550.1
Anarsia innoxiella	BRAKERRRLP00005006602.1
Anarsia innoxiella	BRAKERRRLP00005006614.1
Anarsia innoxiella	BRAKERRRLP00005006673.1
Anarsia innoxiella	BRAKERRRLP00005006712.1
Anarsia innoxiella	BRAKERRRLP00005007614.1
Anarsia innoxiella	BRAKERRRLP00005007743.1
Anarsia innoxiella	BRAKERRRLP00005008520.1
Anarsia innoxiella	BRAKERRRLP00005008709.1
Anarsia innoxiella	BRAKERRRLP00005008766.1
Anarsia innoxiella	BRAKERRRLP00005008771.1
Anarsia innoxiella	BRAKERRRLP00005009811.1
Anarsia innoxiella	BRAKERRRLP00005011267.1
Anarsia innoxiella	BRAKERRRLP00005011415.1
Anarsia innoxiella	BRAKERRRLP00005012024.1
Anarsia innoxiella	BRAKERRRLP00005014294.1
Anarsia innoxiella	BRAKERRRLP00005014723.1
Anarsia innoxiella	BRAKERRRLP00005014778.1
Anarsia innoxiella	BRAKERRRLP00005014982.1
Apoda limacodes	BRAKERLAPP00005000108.1
Apoda limacodes	BRAKERLAPP00005001092.1
Apoda limacodes	BRAKERLAPP00005001441.1
Apoda limacodes	BRAKERLAPP00005001693.1
Apoda limacodes	BRAKERLAPP00005001706.1
Apoda limacodes	BRAKERLAPP00005001867.1
Apoda limacodes	BRAKERLAPP00005001896.1
Apoda limacodes	BRAKERLAPP00005002064.1
Apoda limacodes	BRAKERLAPP00005002081.1
Apoda limacodes	BRAKERLAPP00005002158.1
Apoda limacodes	BRAKERLAPP00005002231.1
Apoda limacodes	BRAKERLAPP00005002336.1
Apoda limacodes	BRAKERLAPP00005002375.1
Apoda limacodes	BRAKERLAPP00005002511.1
Apoda limacodes	BRAKERLAPP00005002515.1
Apoda limacodes	BRAKERLAPP00005002567.1
Apoda limacodes	BRAKERLAPP00005002762.1
Apoda limacodes	BRAKERLAPP00005003257.1
Apoda limacodes	BRAKERLAPP00005003282.1
Apoda limacodes	BRAKERLAPP00005007173.1
Apoda limacodes	BRAKERLAPP00005007199.1
Apoda limacodes	BRAKERLAPP00005007399.1
Apoda limacodes	BRAKERLAPP00005009470.1
Apoda limacodes	BRAKERLAPP00005009578.1
Apoda limacodes	BRAKERLAPP00005009601.1
Apoda limacodes	BRAKERLAPP00005009603.1
Apoda limacodes	BRAKERLAPP00005009606.1
Apoda limacodes	BRAKERLAPP00005009653.1
Apoda limacodes	BRAKERLAPP00005009684.1
Apoda limacodes	BRAKERLAPP00005009750.1
Apoda limacodes	BRAKERLAPP00005009792.1
Apoda limacodes	BRAKERLAPP00005009885.1
Apoda limacodes	BRAKERLAPP00005009896.1
Apoda limacodes	BRAKERLAPP00005009948.1
Apoda limacodes	BRAKERLAPP00005009959.1
Apoda limacodes	BRAKERLAPP00005010004.1
Apoda limacodes	BRAKERLAPP00005010005.1
Apoda limacodes	BRAKERLAPP00005010052.1
Apoda limacodes	BRAKERLAPP00005010072.1
Apoda limacodes	BRAKERLAPP00005010077.1
Apoda limacodes	BRAKERLAPP00005010095.1
Apoda limacodes	BRAKERLAPP00005010139.1
Apoda limacodes	BRAKERLAPP00005010198.1
Apoda limacodes	BRAKERLAPP00005010219.1
Apoda limacodes	BRAKERLAPP00005010236.1
Apoda limacodes	BRAKERLAPP00005010286.1
Apoda limacodes	BRAKERLAPP00005010473.1
Apoda limacodes	BRAKERLAPP00005010490.1
Apoda limacodes	BRAKERLAPP00005010829.1
Apoda limacodes	BRAKERLAPP00005011927.1
Apoda limacodes	BRAKERLAPP00005012020.1
Apoda limacodes	BRAKERLAPP00005012036.1
Apoda limacodes	BRAKERLAPP00005012392.1
Apoda limacodes	BRAKERLAPP00005012809.1
Apoda limacodes	BRAKERLAPP00005013015.1
Apoda limacodes	BRAKERLAPP00005013740.1
Apoda limacodes	BRAKERLAPP00005013767.1
Apoda limacodes	BRAKERLAPP00005013800.1
Apoda limacodes	BRAKERLAPP00005013907.1
Apoda limacodes	BRAKERLAPP00005013960.1
Apoda limacodes	BRAKERLAPP00005013983.1
Apoda limacodes	BRAKERLAPP00005014028.1
Apoda limacodes	BRAKERLAPP00005014032.1
Apoda limacodes	BRAKERLAPP00005014056.1
Apoda limacodes	BRAKERLAPP00005014082.1
Apoda limacodes	BRAKERLAPP00005014137.1
Apoda limacodes	BRAKERLAPP00005014142.1
Apoda limacodes	BRAKERLAPP00005014164.1
Apoda limacodes	BRAKERLAPP00005014405.1
Apoda limacodes	BRAKERLAPP00005014509.1
Apoda limacodes	BRAKERLAPP00005014590.1
Apoda limacodes	BRAKERLAPP00005014655.1
Apoda limacodes	BRAKERLAPP00005014720.1
Apoda limacodes	BRAKERLAPP00005014725.1
Apoda limacodes	BRAKERLAPP00005014793.1
Apoda limacodes	BRAKERLAPP00005014925.1
Apoda limacodes	BRAKERLAPP00005018436.1
Apoda limacodes	BRAKERLAPP00005018595.1
Apoda limacodes	BRAKERLAPP00005018651.1
Apoda limacodes	BRAKERLAPP00005019409.1
Apoda limacodes	BRAKERLAPP00005019435.1
Apoda limacodes	BRAKERLAPP00005023159.1
Archips xylosteana	BRAKERIALP00005001831.1
Archips xylosteana	BRAKERIALP00005004477.1
Archips xylosteana	BRAKERIALP00005004649.1
Archips xylosteana	BRAKERIALP00005005202.1
Archips xylosteana	BRAKERIALP00005005513.1
Archips xylosteana	BRAKERIALP00005005641.1
Archips xylosteana	BRAKERIALP00005006722.1
Archips xylosteana	BRAKERIALP00005006743.1
Archips xylosteana	BRAKERIALP00005006750.1
Archips xylosteana	BRAKERIALP00005006763.1
Archips xylosteana	BRAKERIALP00005006809.1
Archips xylosteana	BRAKERIALP00005006822.1
Archips xylosteana	BRAKERIALP00005006824.1
Archips xylosteana	BRAKERIALP00005006851.1
Archips xylosteana	BRAKERIALP00005006988.1
Archips xylosteana	BRAKERIALP00005006997.1
Archips xylosteana	BRAKERIALP00005007020.1
Archips xylosteana	BRAKERIALP00005007247.1
Archips xylosteana	BRAKERIALP00005007261.1
Archips xylosteana	BRAKERIALP00005007373.1
Archips xylosteana	BRAKERIALP00005007375.1
Archips xylosteana	BRAKERIALP00005007408.1
Archips xylosteana	BRAKERIALP00005009413.1
Archips xylosteana	BRAKERIALP00005009972.1
Archips xylosteana	BRAKERIALP00005010071.1
Archips xylosteana	BRAKERIALP00005010161.1
Archips xylosteana	BRAKERIALP00005010314.1
Archips xylosteana	BRAKERIALP00005014274.1
Archips xylosteana	BRAKERIALP00005014395.1
Archips xylosteana	BRAKERIALP00005014433.1
Archips xylosteana	BRAKERIALP00005014519.1
Archips xylosteana	BRAKERIALP00005014541.1
Archips xylosteana	BRAKERIALP00005014543.1
Archips xylosteana	BRAKERIALP00005014683.1
Archips xylosteana	BRAKERIALP00005014912.1
Archips xylosteana	BRAKERIALP00005014934.1
Archips xylosteana	BRAKERIALP00005015331.1
Archips xylosteana	BRAKERIALP00005015402.1
Archips xylosteana	BRAKERIALP00005015537.1
Archips xylosteana	BRAKERIALP00005015717.1
Archips xylosteana	BRAKERIALP00005015864.1
Archips xylosteana	BRAKERIALP00005015897.1
Archips xylosteana	BRAKERIALP00005015922.1
Archips xylosteana	BRAKERIALP00005016036.1
Archips xylosteana	BRAKERIALP00005016082.1
Archips xylosteana	BRAKERIALP00005016303.1
Archips xylosteana	BRAKERIALP00005016377.1
Archips xylosteana	BRAKERIALP00005018783.1
Aspergillus niger	AAF59929.2
Aspergillus oryzae RIB40	XP_001727544.1
Athripsodes cinereus	BRAKERIRNP00005003488.1
Athripsodes cinereus	BRAKERIRNP00005006651.1
Athripsodes cinereus	BRAKERIRNP00005008357.1
Athripsodes cinereus	BRAKERIRNP00005008609.1
Athripsodes cinereus	BRAKERIRNP00005008952.1
Athripsodes cinereus	BRAKERIRNP00005009605.1
Athripsodes cinereus	BRAKERIRNP00005009640.1
Athripsodes cinereus	BRAKERIRNP00005009756.1
Athripsodes cinereus	BRAKERIRNP00005009796.1
Athripsodes cinereus	BRAKERIRNP00005009800.1
Athripsodes cinereus	BRAKERIRNP00005009881.1
Athripsodes cinereus	BRAKERIRNP00005009885.1
Athripsodes cinereus	BRAKERIRNP00005009930.1
Athripsodes cinereus	BRAKERIRNP00005009939.1
Athripsodes cinereus	BRAKERIRNP00005009980.1
Athripsodes cinereus	BRAKERIRNP00005010025.1
Athripsodes cinereus	BRAKERIRNP00005010071.1
Athripsodes cinereus	BRAKERIRNP00005010085.1
Athripsodes cinereus	BRAKERIRNP00005010133.1
Athripsodes cinereus	BRAKERIRNP00005010142.1
Athripsodes cinereus	BRAKERIRNP00005010149.1
Athripsodes cinereus	BRAKERIRNP00005010150.1
Athripsodes cinereus	BRAKERIRNP00005011015.1
Athripsodes cinereus	BRAKERIRNP00005011187.1
Athripsodes cinereus	BRAKERIRNP00005013772.1
Athripsodes cinereus	BRAKERIRNP00005014163.1
Athripsodes cinereus	BRAKERIRNP00005014375.1
Bembecia ichneumoniformis	ENSBICP00000002615.1
Bembecia ichneumoniformis	ENSBICP00000002661.1
Bembecia ichneumoniformis	ENSBICP00000003159.1
Bembecia ichneumoniformis	ENSBICP00000005581.1
Bembecia ichneumoniformis	ENSBICP00000006376.1
Bembecia ichneumoniformis	ENSBICP00000006542.2
Bembecia ichneumoniformis	ENSBICP00000006544.2
Bembecia ichneumoniformis	ENSBICP00000010185.1
Bembecia ichneumoniformis	ENSBICP00000013410.1
Bembecia ichneumoniformis	ENSBICP00000014017.2
Bembecia ichneumoniformis	ENSBICP00000014882.1
Bembecia ichneumoniformis	ENSBICP00000016030.1
Bembecia ichneumoniformis	ENSBICP00000016296.1
Bembecia ichneumoniformis	ENSBICP00000017238.1
Bembecia ichneumoniformis	ENSBICP00000017334.1
Bembecia ichneumoniformis	ENSBICP00000017669.1
Bembecia ichneumoniformis	ENSBICP00000017758.2
Bembecia ichneumoniformis	ENSBICP00000017828.2
Bembecia ichneumoniformis	ENSBICP00000018391.1
Bembecia ichneumoniformis	ENSBICP00000018636.2
Bembecia ichneumoniformis	ENSBICP00000020852.1
Bembecia ichneumoniformis	ENSBICP00000021569.1
Bombyx mori	NP_001177919.1
Bombyx mori	NP_001243996.1
Bombyx mori	NP_001296500.1
Bombyx mori	XP_004921999.1
Bombyx mori	XP_004922639.1
Bombyx mori	XP_004922768.2
Bombyx mori	XP_004926230.2
Bombyx mori	XP_004928916.1
Bombyx mori	XP_004928917.2
Bombyx mori	XP_004928918.1
Bombyx mori	XP_004929514.1
Bombyx mori	XP_004929545.3
Bombyx mori	XP_004929547.5
Bombyx mori	XP_004933524.1
Bombyx mori	XP_012548032.1
Bombyx mori	XP_012548096.1
Bombyx mori	XP_012548163.2
Bombyx mori	XP_012548164.1
Bombyx mori	XP_012548167.1
Bombyx mori	XP_012553147.2
Bombyx mori	XP_012553437.1
Bombyx mori	XP_021201985.1
Bombyx mori	XP_021203188.2
Bombyx mori	XP_021203676.2
Bombyx mori	XP_021204335.2
Bombyx mori	XP_021204350.1
Bombyx mori	XP_021205528.2
Bombyx mori	XP_021205530.1
Bombyx mori	XP_021209119.1
Bombyx mori	XP_037869862.1
Bombyx mori	XP_037870341.1
Bombyx mori	XP_037870342.1
Bombyx mori	XP_037870547.1
Bombyx mori	XP_037872354.1
Bombyx mori	XP_037872749.1
Bombyx mori	XP_037872865.2
Bombyx mori	XP_037872967.1
Bombyx mori	XP_037873585.2
Bombyx mori	XP_037873722.1
Bombyx mori	XP_062527340.1
Bombyx mori	XP_062528936.1
Bombyx mori	XP_062528937.1
Bombyx mori	XP_062528939.1
Bombyx mori	XP_062528940.1
Bombyx mori	XP_062528979.1
Bombyx mori	XP_062529285.1
Carposina sasakii	ENSCKIP00005000164.1
Carposina sasakii	ENSCKIP00005000301.1
Carposina sasakii	ENSCKIP00005000441.1
Carposina sasakii	ENSCKIP00005000656.1
Carposina sasakii	ENSCKIP00005000946.1
Carposina sasakii	ENSCKIP00005001216.1
Carposina sasakii	ENSCKIP00005001373.1
Carposina sasakii	ENSCKIP00005001405.1
Carposina sasakii	ENSCKIP00005001895.1
Carposina sasakii	ENSCKIP00005002003.1
Carposina sasakii	ENSCKIP00005002122.1
Carposina sasakii	ENSCKIP00005002197.1
Carposina sasakii	ENSCKIP00005002240.1
Carposina sasakii	ENSCKIP00005002244.1
Carposina sasakii	ENSCKIP00005002972.1
Carposina sasakii	ENSCKIP00005003326.1
Carposina sasakii	ENSCKIP00005004012.1
Carposina sasakii	ENSCKIP00005004718.1
Carposina sasakii	ENSCKIP00005004825.1
Carposina sasakii	ENSCKIP00005005488.1
Carposina sasakii	ENSCKIP00005005726.1
Carposina sasakii	ENSCKIP00005005752.1
Carposina sasakii	ENSCKIP00005009359.1
Carposina sasakii	ENSCKIP00005012138.1
Carposina sasakii	ENSCKIP00005016285.1
Carposina sasakii	ENSCKIP00005018965.1
Carposina sasakii	ENSCKIP00005019132.1
Carposina sasakii	ENSCKIP00005021059.1
Carposina sasakii	ENSCKIP00005021625.1
Carposina sasakii	ENSCKIP00005022460.1
Carposina sasakii	ENSCKIP00005022497.1
Carposina sasakii	ENSCKIP00005022506.1
Carposina sasakii	ENSCKIP00005026765.1
Cheumatopsyche charites	BRAKERCCHP00000000805.1
Cheumatopsyche charites	BRAKERCCHP00000001349.1
Cheumatopsyche charites	BRAKERCCHP00000004150.1
Cheumatopsyche charites	BRAKERCCHP00000006964.1
Cheumatopsyche charites	BRAKERCCHP00000008269.1
Cheumatopsyche charites	BRAKERCCHP00000008293.1
Cheumatopsyche charites	BRAKERCCHP00000008345.1
Cheumatopsyche charites	BRAKERCCHP00000008354.1
Cheumatopsyche charites	BRAKERCCHP00000008457.1
Cheumatopsyche charites	BRAKERCCHP00000008483.1
Cheumatopsyche charites	BRAKERCCHP00000008508.1
Cheumatopsyche charites	BRAKERCCHP00000008762.1
Cheumatopsyche charites	BRAKERCCHP00000008945.1
Cheumatopsyche charites	BRAKERCCHP00000008988.1
Cheumatopsyche charites	BRAKERCCHP00000009015.1
Cheumatopsyche charites	BRAKERCCHP00000009133.1
Cheumatopsyche charites	BRAKERCCHP00000009434.1
Chilo suppressalis	CAH0397095.1
Chilo suppressalis	CAH0398065.1
Chilo suppressalis	CAH0398093.1
Chilo suppressalis	CAH0398115.1
Chilo suppressalis	CAH0399327.1
Chilo suppressalis	CAH0401091.1
Chilo suppressalis	CAH0401092.1
Chilo suppressalis	CAH0402601.1
Chilo suppressalis	CAH0402734.1
Chilo suppressalis	CAH0402753.1
Chilo suppressalis	CAH0402789.1
Chilo suppressalis	CAH0402791.1
Chilo suppressalis	CAH0402792.1
Chilo suppressalis	CAH0402794.1
Chilo suppressalis	CAH0402795.1
Chilo suppressalis	CAH0402796.1
Chilo suppressalis	CAH0403443.1
Chilo suppressalis	CAH0405863.1
Chilo suppressalis	CAH0406808.1
Chilo suppressalis	CAH0692829.1
Chilo suppressalis	CAH2980541.1
Chilo suppressalis	CAH2986306.1
Chilo suppressalis	CAH2986966.1
Choreutis nemorana	BRAKERHUHP00000001308.1
Choreutis nemorana	BRAKERHUHP00000001466.1
Choreutis nemorana	BRAKERHUHP00000001545.1
Choreutis nemorana	BRAKERHUHP00000001906.1
Choreutis nemorana	BRAKERHUHP00000001908.1
Choreutis nemorana	BRAKERHUHP00000002060.1
Choreutis nemorana	BRAKERHUHP00000002136.1
Choreutis nemorana	BRAKERHUHP00000003393.1
Choreutis nemorana	BRAKERHUHP00000003614.1
Choreutis nemorana	BRAKERHUHP00000005433.1
Choreutis nemorana	BRAKERHUHP00000005744.1
Choreutis nemorana	BRAKERHUHP00000006480.1
Choreutis nemorana	BRAKERHUHP00000007347.1
Choreutis nemorana	BRAKERHUHP00000007409.1
Choreutis nemorana	BRAKERHUHP00000007445.1
Choreutis nemorana	BRAKERHUHP00000007451.1
Choreutis nemorana	BRAKERHUHP00000007614.1
Choreutis nemorana	BRAKERHUHP00000007721.1
Choreutis nemorana	BRAKERHUHP00000007736.1
Choreutis nemorana	BRAKERHUHP00000007748.1
Choreutis nemorana	BRAKERHUHP00000007797.1
Choreutis nemorana	BRAKERHUHP00000007839.1
Choreutis nemorana	BRAKERHUHP00000007842.1
Choreutis nemorana	BRAKERHUHP00000007878.1
Choreutis nemorana	BRAKERHUHP00000007883.1
Choreutis nemorana	BRAKERHUHP00000007921.1
Choreutis nemorana	BRAKERHUHP00000007938.1
Choreutis nemorana	BRAKERHUHP00000007960.1
Choreutis nemorana	BRAKERHUHP00000008177.1
Choreutis nemorana	BRAKERHUHP00000009805.1
Choreutis nemorana	BRAKERHUHP00000011025.1
Choreutis nemorana	BRAKERHUHP00000011092.1
Choreutis nemorana	BRAKERHUHP00000013127.1
Choreutis nemorana	BRAKERHUHP00000013444.1
Choreutis nemorana	BRAKERHUHP00000013489.1
Choreutis nemorana	BRAKERHUHP00000013662.1
Cydia amplana	BRAKERNAPP00005000156.1
Cydia amplana	BRAKERNAPP00005000320.1
Cydia amplana	BRAKERNAPP00005000547.1
Cydia amplana	BRAKERNAPP00005001208.1
Cydia amplana	BRAKERNAPP00005001560.1
Cydia amplana	BRAKERNAPP00005001659.1
Cydia amplana	BRAKERNAPP00005001668.1
Cydia amplana	BRAKERNAPP00005002968.1
Cydia amplana	BRAKERNAPP00005003002.1
Cydia amplana	BRAKERNAPP00005004026.1
Cydia amplana	BRAKERNAPP00005005043.1
Cydia amplana	BRAKERNAPP00005005137.1
Cydia amplana	BRAKERNAPP00005005436.1
Cydia amplana	BRAKERNAPP00005006649.1
Cydia amplana	BRAKERNAPP00005007023.1
Cydia amplana	BRAKERNAPP00005007064.1
Cydia amplana	BRAKERNAPP00005007096.1
Cydia amplana	BRAKERNAPP00005007102.1
Cydia amplana	BRAKERNAPP00005007114.1
Cydia amplana	BRAKERNAPP00005007202.1
Cydia amplana	BRAKERNAPP00005007221.1
Cydia amplana	BRAKERNAPP00005007253.1
Cydia amplana	BRAKERNAPP00005007262.1
Cydia amplana	BRAKERNAPP00005007344.1
Cydia amplana	BRAKERNAPP00005007368.1
Cydia amplana	BRAKERNAPP00005007389.1
Cydia amplana	BRAKERNAPP00005007433.1
Cydia amplana	BRAKERNAPP00005007466.1
Cydia amplana	BRAKERNAPP00005007496.1
Cydia amplana	BRAKERNAPP00005007504.1
Cydia amplana	BRAKERNAPP00005007556.1
Cydia amplana	BRAKERNAPP00005007868.1
Cydia amplana	BRAKERNAPP00005008110.1
Cydia amplana	BRAKERNAPP00005008155.1
Cydia amplana	BRAKERNAPP00005008380.1
Cydia amplana	BRAKERNAPP00005009257.1
Cydia amplana	BRAKERNAPP00005009506.1
Cydia amplana	BRAKERNAPP00005013436.1
Cydia amplana	BRAKERNAPP00005016708.1
Cydia amplana	BRAKERNAPP00005016742.1
Cydia amplana	BRAKERNAPP00005016800.1
Cydia amplana	BRAKERNAPP00005016809.1
Cydia amplana	BRAKERNAPP00005016929.1
Cydia amplana	BRAKERNAPP00005017296.1
Cydia amplana	BRAKERNAPP00005017613.1
Danaus plexippus plexippus	ENSDPXP00005000202.1
Danaus plexippus plexippus	ENSDPXP00005000262.1
Danaus plexippus plexippus	ENSDPXP00005002553.1
Danaus plexippus plexippus	ENSDPXP00005004708.1
Danaus plexippus plexippus	ENSDPXP00005005379.1
Danaus plexippus plexippus	ENSDPXP00005015166.1
Danaus plexippus plexippus	ENSDPXP00005016694.1
Danaus plexippus plexippus	ENSDPXP00005019841.1
Danaus plexippus plexippus	ENSDPXP00005022241.1
Danaus plexippus plexippus	ENSDPXP00005022329.1
Danaus plexippus plexippus	ENSDPXP00005022760.1
Danaus plexippus plexippus	ENSDPXP00005022776.1
Danaus plexippus plexippus	ENSDPXP00005022784.1
Danaus plexippus plexippus	ENSDPXP00005023290.1
Danaus plexippus plexippus	ENSDPXP00005024204.1
Danaus plexippus plexippus	ENSDPXP00005024251.1
Danaus plexippus plexippus	ENSDPXP00005024447.1
Danaus plexippus plexippus	ENSDPXP00005024801.1
Danaus plexippus plexippus	ENSDPXP00005024822.1
Danaus plexippus plexippus	ENSDPXP00005024931.1
Danaus plexippus plexippus	ENSDPXP00005025534.1
Danaus plexippus plexippus	ENSDPXP00005025570.1
Danaus plexippus plexippus	ENSDPXP00005025668.1
Danaus plexippus plexippus	ENSDPXP00005025751.1
Danaus plexippus plexippus	ENSDPXP00005026196.1
Danaus plexippus plexippus	ENSDPXP00005026633.1
Danaus plexippus plexippus	ENSDPXP00005026943.1
Danaus plexippus plexippus	ENSDPXP00005027221.1
Danaus plexippus plexippus	ENSDPXP00005027252.1
Danaus plexippus plexippus	ENSDPXP00005027378.1
Drepana falcataria	ENSDFAP00010000400.1
Drepana falcataria	ENSDFAP00010000939.1
Drepana falcataria	ENSDFAP00010001794.1
Drepana falcataria	ENSDFAP00010002405.1
Drepana falcataria	ENSDFAP00010002588.1
Drepana falcataria	ENSDFAP00010004204.1
Drepana falcataria	ENSDFAP00010004716.1
Drepana falcataria	ENSDFAP00010005104.1
Drepana falcataria	ENSDFAP00010005984.1
Drepana falcataria	ENSDFAP00010007837.1
Drepana falcataria	ENSDFAP00010008037.1
Drepana falcataria	ENSDFAP00010008125.1
Drepana falcataria	ENSDFAP00010008800.1
Drepana falcataria	ENSDFAP00010009942.1
Drepana falcataria	ENSDFAP00010010395.1
Drepana falcataria	ENSDFAP00010010858.1
Drepana falcataria	ENSDFAP00010014821.1
Drepana falcataria	ENSDFAP00010018731.1
Drepana falcataria	ENSDFAP00010019594.1
Drepana falcataria	ENSDFAP00010019831.1
Drepana falcataria	ENSDFAP00010020184.1
Drosophila melanogaster	FBpp0073791
Drosophila melanogaster	FBpp0073792
Drosophila melanogaster	FBpp0073793
Drosophila melanogaster	FBpp0073795
Drosophila melanogaster	FBpp0073796
Drosophila melanogaster	FBpp0073797
Drosophila melanogaster	FBpp0073800
Drosophila melanogaster	FBpp0073801
Drosophila melanogaster	FBpp0073802
Drosophila melanogaster	FBpp0073803
Drosophila melanogaster	FBpp0073804
Drosophila melanogaster	FBpp0084360
Drosophila melanogaster	FBpp0310796
Drosophila melanogaster	FBpp0422604
Emmelina monodactyla	ENSEMNP00005000949.1
Emmelina monodactyla	ENSEMNP00005001648.1
Emmelina monodactyla	ENSEMNP00005003366.1
Emmelina monodactyla	ENSEMNP00005003608.1
Emmelina monodactyla	ENSEMNP00005003680.1
Emmelina monodactyla	ENSEMNP00005004133.1
Emmelina monodactyla	ENSEMNP00005004471.1
Emmelina monodactyla	ENSEMNP00005005472.1
Emmelina monodactyla	ENSEMNP00005005477.1
Emmelina monodactyla	ENSEMNP00005005990.1
Emmelina monodactyla	ENSEMNP00005006152.1
Emmelina monodactyla	ENSEMNP00005007959.1
Emmelina monodactyla	ENSEMNP00005010519.1
Emmelina monodactyla	ENSEMNP00005011155.1
Emmelina monodactyla	ENSEMNP00005012073.1
Emmelina monodactyla	ENSEMNP00005012607.1
Emmelina monodactyla	ENSEMNP00005014066.1
Emmelina monodactyla	ENSEMNP00005014521.1
Emmelina monodactyla	ENSEMNP00005014899.1
Emmelina monodactyla	ENSEMNP00005017129.1
Emmelina monodactyla	ENSEMNP00005017537.1
Emmelina monodactyla	ENSEMNP00005017902.1
Emmelina monodactyla	ENSEMNP00005018348.1
Emmelina monodactyla	ENSEMNP00005018628.1
Emmelina monodactyla	ENSEMNP00005018651.1
Emmelina monodactyla	ENSEMNP00005018838.1
Galleria mellonella	XP_026749221.1
Galleria mellonella	XP_026749602.1
Galleria mellonella	XP_026749639.1
Galleria mellonella	XP_026749713.2
Galleria mellonella	XP_026751618.1
Galleria mellonella	XP_026752115.1
Galleria mellonella	XP_026753315.1
Galleria mellonella	XP_026754688.2
Galleria mellonella	XP_026754846.1
Galleria mellonella	XP_026754848.1
Galleria mellonella	XP_026754850.1
Galleria mellonella	XP_026754851.1
Galleria mellonella	XP_026754852.2
Galleria mellonella	XP_026754951.1
Galleria mellonella	XP_026755829.1
Galleria mellonella	XP_026756586.1
Galleria mellonella	XP_026759445.1
Galleria mellonella	XP_026761947.2
Galleria mellonella	XP_026762381.1
Galleria mellonella	XP_026763613.2
Galleria mellonella	XP_026764378.1
Galleria mellonella	XP_031762871.1
Galleria mellonella	XP_031764287.1
Galleria mellonella	XP_031764420.1
Galleria mellonella	XP_031764474.1
Galleria mellonella	XP_031764483.1
Galleria mellonella	XP_031765752.1
Galleria mellonella	XP_031765753.1
Galleria mellonella	XP_031765765.1
Galleria mellonella	XP_031765870.1
Galleria mellonella	XP_031766051.1
Galleria mellonella	XP_031766052.1
Galleria mellonella	XP_031766057.1
Galleria mellonella	XP_031766058.1
Galleria mellonella	XP_031766059.1
Galleria mellonella	XP_031767166.1
Glyphotaelius pellucidus	ENSGPLP00000002895.1
Glyphotaelius pellucidus	ENSGPLP00000006073.1
Glyphotaelius pellucidus	ENSGPLP00000006926.1
Glyphotaelius pellucidus	ENSGPLP00000007015.1
Glyphotaelius pellucidus	ENSGPLP00000007366.1
Glyphotaelius pellucidus	ENSGPLP00000007937.1
Glyphotaelius pellucidus	ENSGPLP00000008443.1
Glyphotaelius pellucidus	ENSGPLP00000008739.1
Glyphotaelius pellucidus	ENSGPLP00000008969.1
Glyphotaelius pellucidus	ENSGPLP00000009744.1
Glyphotaelius pellucidus	ENSGPLP00000011108.1
Glyphotaelius pellucidus	ENSGPLP00000011782.1
Glyphotaelius pellucidus	ENSGPLP00000014244.1
Glyphotaelius pellucidus	ENSGPLP00000015902.1
Glyphotaelius pellucidus	ENSGPLP00000017695.1
Chloridea virescens	PCG64563.1
Chloridea virescens	PCG64789.1
Chloridea virescens	PCG65132.1
Chloridea virescens	PCG65171.1
Chloridea virescens	PCG65195.1
Chloridea virescens	PCG65227.1
Chloridea virescens	PCG67845.1
Chloridea virescens	PCG67846.1
Chloridea virescens	PCG68660.1
Chloridea virescens	PCG68902.1
Chloridea virescens	PCG69794.1
Chloridea virescens	PCG70005.1
Chloridea virescens	PCG70657.1
Chloridea virescens	PCG70889.1
Chloridea virescens	PCG71170.1
Chloridea virescens	PCG71172.1
Chloridea virescens	PCG71173.1
Chloridea virescens	PCG71174.1
Chloridea virescens	PCG72577.1
Chloridea virescens	PCG72578.1
Chloridea virescens	PCG73240.1
Chloridea virescens	PCG73341.1
Chloridea virescens	PCG73342.1
Chloridea virescens	PCG74381.1
Chloridea virescens	PCG74382.1
Chloridea virescens	PCG75661.1
Chloridea virescens	PCG75884.1
Chloridea virescens	PCG76355.1
Chloridea virescens	PCG76483.1
Chloridea virescens	PCG78014.1
Chloridea virescens	PCG78026.1
Chloridea virescens	PCG78591.1
Chloridea virescens	PCG78592.1
Chloridea virescens	PCG78593.1
Chloridea virescens	PCG78596.1
Chloridea virescens	PCG78597.1
Chloridea virescens	PCG79619.1
Chloridea virescens	PCG79620.1
Chloridea virescens	PCG79621.1
Chloridea virescens	PCG80370.1
Luffia ferchaultella	ENSRWZP00000000492.1
Luffia ferchaultella	ENSRWZP00000001956.1
Luffia ferchaultella	ENSRWZP00000002806.1
Luffia ferchaultella	ENSRWZP00000003050.1
Luffia ferchaultella	ENSRWZP00000003124.1
Luffia ferchaultella	ENSRWZP00000003183.1
Luffia ferchaultella	ENSRWZP00000003652.1
Luffia ferchaultella	ENSRWZP00000004216.1
Luffia ferchaultella	ENSRWZP00000004849.1
Luffia ferchaultella	ENSRWZP00000004942.1
Luffia ferchaultella	ENSRWZP00000005068.1
Luffia ferchaultella	ENSRWZP00000005210.1
Luffia ferchaultella	ENSRWZP00000005423.1
Luffia ferchaultella	ENSRWZP00000007623.1
Luffia ferchaultella	ENSRWZP00000008765.1
Luffia ferchaultella	ENSRWZP00000009452.1
Luffia ferchaultella	ENSRWZP00000009483.1
Luffia ferchaultella	ENSRWZP00000010831.1
Luffia ferchaultella	ENSRWZP00000011169.1
Luffia ferchaultella	ENSRWZP00000011619.1
Luffia ferchaultella	ENSRWZP00000011972.1
Luffia ferchaultella	ENSRWZP00000018202.1
Macaria notata	BRAKERMONP00005000102.1
Macaria notata	BRAKERMONP00005000164.1
Macaria notata	BRAKERMONP00005000481.1
Macaria notata	BRAKERMONP00005000821.1
Macaria notata	BRAKERMONP00005004078.1
Macaria notata	BRAKERMONP00005004922.1
Macaria notata	BRAKERMONP00005005193.1
Macaria notata	BRAKERMONP00005006260.1
Macaria notata	BRAKERMONP00005006315.1
Macaria notata	BRAKERMONP00005008073.1
Macaria notata	BRAKERMONP00005008370.1
Macaria notata	BRAKERMONP00005008555.1
Macaria notata	BRAKERMONP00005008603.1
Macaria notata	BRAKERMONP00005008682.1
Macaria notata	BRAKERMONP00005008745.1
Macaria notata	BRAKERMONP00005008823.1
Macaria notata	BRAKERMONP00005008829.1
Macaria notata	BRAKERMONP00005008831.1
Macaria notata	BRAKERMONP00005008966.1
Macaria notata	BRAKERMONP00005008993.1
Macaria notata	BRAKERMONP00005009032.1
Macaria notata	BRAKERMONP00005009086.1
Macaria notata	BRAKERMONP00005010158.1
Macaria notata	BRAKERMONP00005010978.1
Macaria notata	BRAKERMONP00005011371.1
Macaria notata	BRAKERMONP00005016467.1
Macaria notata	BRAKERMONP00005016477.1
Macaria notata	BRAKERMONP00005016748.1
Macaria notata	BRAKERMONP00005016881.1
Macaria notata	BRAKERMONP00005016975.1
Macaria notata	BRAKERMONP00005017009.1
Macaria notata	BRAKERMONP00005017234.1
Manduca sexta	XP_030020485.2
Manduca sexta	XP_030020891.1
Manduca sexta	XP_030021022.1
Manduca sexta	XP_030021054.1
Manduca sexta	XP_030021585.1
Manduca sexta	XP_030021958.1
Manduca sexta	XP_030022190.1
Manduca sexta	XP_030023285.2
Manduca sexta	XP_030025618.1
Manduca sexta	XP_030025619.2
Manduca sexta	XP_030025643.2
Manduca sexta	XP_030028338.2
Manduca sexta	XP_030028540.1
Manduca sexta	XP_030029851.1
Manduca sexta	XP_030029852.1
Manduca sexta	XP_030030517.1
Manduca sexta	XP_030032189.1
Manduca sexta	XP_030032987.1
Manduca sexta	XP_030033783.1
Manduca sexta	XP_030033986.1
Manduca sexta	XP_030033989.1
Manduca sexta	XP_030033990.1
Manduca sexta	XP_030034769.2
Manduca sexta	XP_030034771.1
Manduca sexta	XP_030034774.2
Manduca sexta	XP_030034776.2
Manduca sexta	XP_030034781.2
Manduca sexta	XP_030035814.1
Manduca sexta	XP_030035816.2
Manduca sexta	XP_030036004.1
Manduca sexta	XP_030036014.1
Manduca sexta	XP_030036081.2
Manduca sexta	XP_030036082.2
Manduca sexta	XP_030036084.2
Manduca sexta	XP_030036085.1
Manduca sexta	XP_030036087.2
Manduca sexta	XP_030036407.1
Manduca sexta	XP_030037989.1
Manduca sexta	XP_030040119.2
Manduca sexta	XP_030040700.2
Manduca sexta	XP_037292672.1
Manduca sexta	XP_037292675.1
Manduca sexta	XP_037292677.1
Manduca sexta	XP_037292678.1
Manduca sexta	XP_037294969.1
Manduca sexta	XP_037298046.1
Manduca sexta	XP_037298050.1
Manduca sexta	XP_037298052.1
Manduca sexta	XP_037299155.1
Manduca sexta	XP_037300609.1
Manduca sexta	XP_037300734.1
Marasmarcha lunaedactyla	BRAKERMLDP00005004003.1
Marasmarcha lunaedactyla	BRAKERMLDP00005004207.1
Marasmarcha lunaedactyla	BRAKERMLDP00005006389.1
Marasmarcha lunaedactyla	BRAKERMLDP00005006396.1
Marasmarcha lunaedactyla	BRAKERMLDP00005006470.1
Marasmarcha lunaedactyla	BRAKERMLDP00005006483.1
Marasmarcha lunaedactyla	BRAKERMLDP00005006501.1
Marasmarcha lunaedactyla	BRAKERMLDP00005006545.1
Marasmarcha lunaedactyla	BRAKERMLDP00005006648.1
Marasmarcha lunaedactyla	BRAKERMLDP00005006724.1
Marasmarcha lunaedactyla	BRAKERMLDP00005006774.1
Marasmarcha lunaedactyla	BRAKERMLDP00005006801.1
Marasmarcha lunaedactyla	BRAKERMLDP00005006828.1
Marasmarcha lunaedactyla	BRAKERMLDP00005006884.1
Marasmarcha lunaedactyla	BRAKERMLDP00005006935.1
Marasmarcha lunaedactyla	BRAKERMLDP00005006939.1
Marasmarcha lunaedactyla	BRAKERMLDP00005006978.1
Marasmarcha lunaedactyla	BRAKERMLDP00005007051.1
Marasmarcha lunaedactyla	BRAKERMLDP00005007058.1
Marasmarcha lunaedactyla	BRAKERMLDP00005007910.1
Marasmarcha lunaedactyla	BRAKERMLDP00005007947.1
Marasmarcha lunaedactyla	BRAKERMLDP00005008013.1
Marasmarcha lunaedactyla	BRAKERMLDP00005008024.1
Marasmarcha lunaedactyla	BRAKERMLDP00005008276.1
Marasmarcha lunaedactyla	BRAKERMLDP00005008299.1
Marasmarcha lunaedactyla	BRAKERMLDP00005008328.1
Marasmarcha lunaedactyla	BRAKERMLDP00005009247.1
Marasmarcha lunaedactyla	BRAKERMLDP00005009517.1
Marasmarcha lunaedactyla	BRAKERMLDP00005009552.1
Marasmarcha lunaedactyla	BRAKERMLDP00005012703.1
Marasmarcha lunaedactyla	BRAKERMLDP00005014357.1
Marasmarcha lunaedactyla	BRAKERMLDP00005018498.1
Marasmarcha lunaedactyla	BRAKERMLDP00005018863.1
Marasmarcha lunaedactyla	BRAKERMLDP00005018940.1
Marasmarcha lunaedactyla	BRAKERMLDP00005019744.1
Marasmarcha lunaedactyla	BRAKERMLDP00005020226.1
Marasmarcha lunaedactyla	BRAKERMLDP00005020386.1
Micropterix aruncella	ENSAXIP00000000139.1
Micropterix aruncella	ENSAXIP00000000476.1
Micropterix aruncella	ENSAXIP00000000499.1
Micropterix aruncella	ENSAXIP00000000620.1
Micropterix aruncella	ENSAXIP00000001909.1
Micropterix aruncella	ENSAXIP00000002165.1
Micropterix aruncella	ENSAXIP00000002651.1
Micropterix aruncella	ENSAXIP00000002687.1
Micropterix aruncella	ENSAXIP00000002717.1
Micropterix aruncella	ENSAXIP00000002891.1
Micropterix aruncella	ENSAXIP00000003676.1
Micropterix aruncella	ENSAXIP00000003719.1
Micropterix aruncella	ENSAXIP00000004205.1
Micropterix aruncella	ENSAXIP00000004255.1
Micropterix aruncella	ENSAXIP00000004313.1
Micropterix aruncella	ENSAXIP00000004558.1
Micropterix aruncella	ENSAXIP00000004692.1
Micropterix aruncella	ENSAXIP00000005088.1
Micropterix aruncella	ENSAXIP00000007505.1
Micropterix aruncella	ENSAXIP00000008364.1
Micropterix aruncella	ENSAXIP00000010616.1
Micropterix aruncella	ENSAXIP00000014079.1
Micropterix aruncella	ENSAXIP00000014874.1
Micropterix aruncella	ENSAXIP00000017177.1
Micropterix aruncella	ENSAXIP00000017195.1
Operophtera brumata	ENSOBRP00005001790.1
Operophtera brumata	ENSOBRP00005007886.1
Operophtera brumata	ENSOBRP00005008380.1
Operophtera brumata	ENSOBRP00005008749.1
Operophtera brumata	ENSOBRP00005009337.1
Operophtera brumata	ENSOBRP00005009696.1
Operophtera brumata	ENSOBRP00005010549.1
Operophtera brumata	ENSOBRP00005010833.1
Operophtera brumata	ENSOBRP00005011463.1
Operophtera brumata	ENSOBRP00005011939.1
Operophtera brumata	ENSOBRP00005012102.1
Operophtera brumata	ENSOBRP00005012161.1
Operophtera brumata	ENSOBRP00005012326.1
Operophtera brumata	ENSOBRP00005012872.1
Operophtera brumata	ENSOBRP00005013809.1
Operophtera brumata	ENSOBRP00005015097.1
Operophtera brumata	ENSOBRP00005016575.1
Operophtera brumata	ENSOBRP00005018085.1
Operophtera brumata	ENSOBRP00005019468.1
Operophtera brumata	ENSOBRP00005022583.1
Operophtera brumata	ENSOBRP00005024498.1
Operophtera brumata	ENSOBRP00005025744.1
Operophtera brumata	ENSOBRP00005027039.1
Operophtera brumata	ENSOBRP00005027186.1
Operophtera brumata	ENSOBRP00005028862.1
Operophtera brumata	ENSOBRP00005030128.1
Operophtera brumata	ENSOBRP00005032482.1
Operophtera brumata	ENSOBRP00005032633.1
Operophtera brumata	ENSOBRP00005033965.1
Operophtera brumata	ENSOBRP00005035991.1
Operophtera brumata	ENSOBRP00005037276.1
Operophtera brumata	ENSOBRP00005038445.1
Operophtera brumata	ENSOBRP00005041153.1
Palaephatus luteolus	GEON01003835_7
Palaephatus luteolus	GEON01003907_1
Palaephatus luteolus	GEON01008714_6
Palaephatus luteolus	GEON01011146_1
Palaephatus luteolus	GEON01011676_2
Palaephatus luteolus	GEON01011991_4
Palaephatus luteolus	GEON01017481_4
Palaephatus luteolus	GEON01020674_1
Palaephatus luteolus	GEON01021255_7
Palaephatus luteolus	GEON01021854_4
Palaephatus luteolus	GEON01024163_4
Penicillium amagasakiense	AAD01493.1
Phymatopus californicus	GEOO01004273_3
Phymatopus californicus	GEOO01005433_2
Phymatopus californicus	GEOO01008679_3
Phymatopus californicus	GEOO01009505_3
Phymatopus californicus	GEOO01027366_2
Phymatopus californicus	GEOO01027367_4
Phymatopus californicus	GEOO01035474_3
Phymatopus californicus	GEOO01037085_2
Phymatopus californicus	GEOO01039767_1
Pieris rapae	ENSPRPP00005004041.1
Pieris rapae	ENSPRPP00005004420.1
Pieris rapae	ENSPRPP00005007032.1
Pieris rapae	ENSPRPP00005007702.1
Pieris rapae	ENSPRPP00005009022.1
Pieris rapae	ENSPRPP00005009152.1
Pieris rapae	ENSPRPP00005010715.1
Pieris rapae	ENSPRPP00005011385.1
Pieris rapae	ENSPRPP00005011444.1
Pieris rapae	ENSPRPP00005011883.1
Pieris rapae	ENSPRPP00005012136.1
Pieris rapae	ENSPRPP00005014171.1
Pieris rapae	ENSPRPP00005015925.1
Pieris rapae	ENSPRPP00005017827.1
Pieris rapae	ENSPRPP00005017972.1
Pieris rapae	ENSPRPP00005019529.1
Pieris rapae	ENSPRPP00005021499.1
Pieris rapae	ENSPRPP00005021544.1
Pieris rapae	ENSPRPP00005022202.1
Pieris rapae	ENSPRPP00005023043.1
Pieris rapae	ENSPRPP00005023396.1
Pieris rapae	ENSPRPP00005023707.1
Pieris rapae	ENSPRPP00005024113.1
Pieris rapae	ENSPRPP00005024834.1
Pieris rapae	ENSPRPP00005026259.1
Pieris rapae	ENSPRPP00005026452.1
Pieris rapae	ENSPRPP00005027153.1
Pieris rapae	ENSPRPP00005027595.1
Plutella xylostella	ENSPXYP00000000828.1
Plutella xylostella	ENSPXYP00000001089.1
Plutella xylostella	ENSPXYP00000001091.1
Plutella xylostella	ENSPXYP00000003057.1
Plutella xylostella	ENSPXYP00000003539.1
Plutella xylostella	ENSPXYP00000006034.1
Plutella xylostella	ENSPXYP00000006205.1
Plutella xylostella	ENSPXYP00000006469.1
Plutella xylostella	ENSPXYP00000006711.1
Plutella xylostella	ENSPXYP00000006728.1
Plutella xylostella	ENSPXYP00000006924.1
Plutella xylostella	ENSPXYP00000007160.1
Plutella xylostella	ENSPXYP00000007670.1
Plutella xylostella	ENSPXYP00000007935.1
Plutella xylostella	ENSPXYP00000008119.1
Plutella xylostella	ENSPXYP00000008441.1
Plutella xylostella	ENSPXYP00000008563.1
Plutella xylostella	ENSPXYP00000008793.1
Plutella xylostella	ENSPXYP00000008853.1
Plutella xylostella	ENSPXYP00000009237.1
Plutella xylostella	ENSPXYP00000009425.1
Plutella xylostella	ENSPXYP00000009555.1
Plutella xylostella	ENSPXYP00000009777.1
Plutella xylostella	ENSPXYP00000009795.1
Plutella xylostella	ENSPXYP00000009919.1
Plutella xylostella	ENSPXYP00000010586.1
Plutella xylostella	ENSPXYP00000010600.1
Plutella xylostella	ENSPXYP00000010641.1
Plutella xylostella	ENSPXYP00000010882.1
Plutella xylostella	ENSPXYP00000011009.1
Plutella xylostella	ENSPXYP00000011201.1
Plutella xylostella	ENSPXYP00000011260.1
Plutella xylostella	ENSPXYP00000012258.1
Plutella xylostella	ENSPXYP00000013312.1
Plutella xylostella	ENSPXYP00000014094.1
Plutella xylostella	ENSPXYP00000014538.1
Plutella xylostella	ENSPXYP00000014848.1
Plutella xylostella	ENSPXYP00000015013.1
Plutella xylostella	ENSPXYP00000015066.1
Plutella xylostella	ENSPXYP00000015190.1
Plutella xylostella	ENSPXYP00000017401.1
Plutella xylostella	ENSPXYP00000017455.1
Plutella xylostella	ENSPXYP00000018648.1
Plutella xylostella	ENSPXYP00000023585.1
Ptyssoptera sp. AB-2015	GERG01049956_2
Ptyssoptera sp. AB-2015	GERG01054418_2
Ptyssoptera sp. AB-2015	GERG01081163_1
Ptyssoptera sp. AB-2015	GERG01083774_2
Ptyssoptera sp. AB-2015	GERG01085207_1
Ptyssoptera sp. AB-2015	GERG01085749_1
Ptyssoptera sp. AB-2015	GERG01091182_2
Ptyssoptera sp. AB-2015	GERG01091183_2
Ptyssoptera sp. AB-2015	GERG01099030_2
Ptyssoptera sp. AB-2015	GERG01101325_1
Ptyssoptera sp. AB-2015	GERG01101676_2
Ptyssoptera sp. AB-2015	GERG01105339_1
Ptyssoptera sp. AB-2015	GERG01114941_7
Ptyssoptera sp. AB-2015	GERG01116501_1
Ptyssoptera sp. AB-2015	GERG01122518_1
Spodoptera frugiperda	XP_035430625.1
Spodoptera frugiperda	XP_035430639.1
Spodoptera frugiperda	XP_035432659.1
Spodoptera frugiperda	XP_035432750.1
Spodoptera frugiperda	XP_035432751.1
Spodoptera frugiperda	XP_035432773.1
Spodoptera frugiperda	XP_035432774.1
Spodoptera frugiperda	XP_035432776.1
Spodoptera frugiperda	XP_035432780.1
Spodoptera frugiperda	XP_035432826.1
Spodoptera frugiperda	XP_035432861.1
Spodoptera frugiperda	XP_035433036.1
Spodoptera frugiperda	XP_035433039.1
Spodoptera frugiperda	XP_035433040.1
Spodoptera frugiperda	XP_035433041.1
Spodoptera frugiperda	XP_035433209.1
Spodoptera frugiperda	XP_035433228.1
Spodoptera frugiperda	XP_035433229.1
Spodoptera frugiperda	XP_035433250.1
Spodoptera frugiperda	XP_035433255.1
Spodoptera frugiperda	XP_035433257.1
Spodoptera frugiperda	XP_035433259.1
Spodoptera frugiperda	XP_035433260.1
Spodoptera frugiperda	XP_035433319.1
Spodoptera frugiperda	XP_035433362.1
Spodoptera frugiperda	XP_035433414.1
Spodoptera frugiperda	XP_035434214.1
Spodoptera frugiperda	XP_035434388.1
Spodoptera frugiperda	XP_035434459.1
Spodoptera frugiperda	XP_035434462.1
Spodoptera frugiperda	XP_035434466.1
Spodoptera frugiperda	XP_035434719.1
Spodoptera frugiperda	XP_035434734.1
Spodoptera frugiperda	XP_035434758.1
Spodoptera frugiperda	XP_035434762.1
Spodoptera frugiperda	XP_035434764.1
Spodoptera frugiperda	XP_035435060.1
Spodoptera frugiperda	XP_035435546.1
Spodoptera frugiperda	XP_035435556.1
Spodoptera frugiperda	XP_035435557.1
Spodoptera frugiperda	XP_035435558.1
Spodoptera frugiperda	XP_035435559.1
Spodoptera frugiperda	XP_035437887.1
Spodoptera frugiperda	XP_035442956.1
Spodoptera frugiperda	XP_035443020.1
Spodoptera frugiperda	XP_035443430.1
Spodoptera frugiperda	XP_035443431.1
Spodoptera frugiperda	XP_035443441.1
Spodoptera frugiperda	XP_035447328.1
Spodoptera frugiperda	XP_035448057.1
Spodoptera frugiperda	XP_035448179.1
Spodoptera frugiperda	XP_035448180.1
Spodoptera frugiperda	XP_035448181.1
Spodoptera frugiperda	XP_035448182.1
Spodoptera frugiperda	XP_035448183.1
Spodoptera frugiperda	XP_035448185.1
Spodoptera frugiperda	XP_035448188.1
Spodoptera frugiperda	XP_035448189.1
Spodoptera frugiperda	XP_035448190.1
Spodoptera frugiperda	XP_035448191.1
Spodoptera frugiperda	XP_035448192.1
Spodoptera frugiperda	XP_035448193.1
Spodoptera frugiperda	XP_035448406.1
Spodoptera frugiperda	XP_035448440.1
Spodoptera frugiperda	XP_035448536.1
Spodoptera frugiperda	XP_035450442.1
Spodoptera frugiperda	XP_035450607.1
Spodoptera frugiperda	XP_035450608.1
Spodoptera frugiperda	XP_035450611.1
Spodoptera frugiperda	XP_035450613.1
Spodoptera frugiperda	XP_035451172.1
Spodoptera frugiperda	XP_035451173.1
Spodoptera frugiperda	XP_035451174.1
Spodoptera frugiperda	XP_035451211.1
Spodoptera frugiperda	XP_035451444.1
Spodoptera frugiperda	XP_035454502.1
Spodoptera frugiperda	XP_035454939.1
Spodoptera frugiperda	XP_035454955.1
Spodoptera frugiperda	XP_035454956.1
Spodoptera frugiperda	XP_035456054.1
Tinea trinotella	ENSTTNP00000000808.1
Tinea trinotella	ENSTTNP00000001073.1
Tinea trinotella	ENSTTNP00000002054.1
Tinea trinotella	ENSTTNP00000002200.1
Tinea trinotella	ENSTTNP00000003946.1
Tinea trinotella	ENSTTNP00000004470.1
Tinea trinotella	ENSTTNP00000004657.1
Tinea trinotella	ENSTTNP00000005561.1
Tinea trinotella	ENSTTNP00000007268.1
Tinea trinotella	ENSTTNP00000007297.1
Tinea trinotella	ENSTTNP00000007767.1
Tinea trinotella	ENSTTNP00000008823.1
Tinea trinotella	ENSTTNP00000009462.1
Tinea trinotella	ENSTTNP00000012533.1
Tinea trinotella	ENSTTNP00000013392.1
Tinea trinotella	ENSTTNP00000014542.1
Tinea trinotella	ENSTTNP00000014811.1
Tinea trinotella	ENSTTNP00000017100.1
Tinea trinotella	ENSTTNP00000017115.1
Tischeria quercitella	GENO01014732_4
Tischeria quercitella	GENO01024166_4
Tischeria quercitella	GENO01033941_2
Tischeria quercitella	GENO01036160_1
Tischeria quercitella	GENO01038230_3
Tischeria quercitella	GENO01043346_3
Tischeria quercitella	GENO01043657_3
Tischeria quercitella	GENO01064984_1
Tischeria quercitella	GENO01070581_3
Tischeria quercitella	GENO01070830_3
Tischeria quercitella	GENO01084995_1
Tischeria quercitella	GENO01086090_1
Tischeria quercitella	GENO01086591_1
Tischeria quercitella	GENO01093018_2
Tischeria quercitella	GENO01102215_6
Tischeria quercitella	GENO01106354_2
Tischeria quercitella	GENO01118239_1
Tischeria quercitella	GENO01139711_2
Tischeria quercitella	GENO01156592_3
Tischeria quercitella	GENO01178329_1
Tischeria quercitella	GENO01179344_1
Triodia sylvina	GAVB02023640_1
Triodia sylvina	GAVB02024362_1
Triodia sylvina	GAVB02025295_2
Triodia sylvina	GAVB02025857_1
Triodia sylvina	GAVB02026541_2
Triodia sylvina	GAVB02026876_3
Triodia sylvina	GAVB02026981_2
Triodia sylvina	GAVB02039498_1
Triodia sylvina	GAVB02039499_1
Triodia sylvina	GAVB02040119_2
Yponomeuta cagnagella	ENSEAOP00005001330.1
Yponomeuta cagnagella	ENSEAOP00005001455.1
Yponomeuta cagnagella	ENSEAOP00005004316.1
Yponomeuta cagnagella	ENSEAOP00005005127.1
Yponomeuta cagnagella	ENSEAOP00005005896.1
Yponomeuta cagnagella	ENSEAOP00005007078.1
Yponomeuta cagnagella	ENSEAOP00005008094.1
Yponomeuta cagnagella	ENSEAOP00005008514.1
Yponomeuta cagnagella	ENSEAOP00005009138.1
Yponomeuta cagnagella	ENSEAOP00005009500.1
Yponomeuta cagnagella	ENSEAOP00005009622.1
Yponomeuta cagnagella	ENSEAOP00005009819.1
Yponomeuta cagnagella	ENSEAOP00005010102.1
Yponomeuta cagnagella	ENSEAOP00005010389.1
Yponomeuta cagnagella	ENSEAOP00005010433.1
Yponomeuta cagnagella	ENSEAOP00005010486.1
Yponomeuta cagnagella	ENSEAOP00005010510.1
Yponomeuta cagnagella	ENSEAOP00005010572.1
Yponomeuta cagnagella	ENSEAOP00005010797.1
Yponomeuta cagnagella	ENSEAOP00005011181.1
Yponomeuta cagnagella	ENSEAOP00005011260.1
Yponomeuta cagnagella	ENSEAOP00005011300.1
Yponomeuta cagnagella	ENSEAOP00005011380.1
Yponomeuta cagnagella	ENSEAOP00005012727.1
Yponomeuta cagnagella	ENSEAOP00005012869.1
Yponomeuta cagnagella	ENSEAOP00005012934.1
Yponomeuta cagnagella	ENSEAOP00005013126.1
Yponomeuta cagnagella	ENSEAOP00005013165.1
Yponomeuta cagnagella	ENSEAOP00005014466.1
Yponomeuta cagnagella	ENSEAOP00005015313.1
Yponomeuta cagnagella	ENSEAOP00005015958.1
Yponomeuta cagnagella	ENSEAOP00005016528.1
Yponomeuta cagnagella	ENSEAOP00005016714.1
Yponomeuta cagnagella	ENSEAOP00005023633.1
Yponomeuta cagnagella	ENSEAOP00005025626.1
Yponomeuta cagnagella	ENSEAOP00005026582.1
Yponomeuta cagnagella	ENSEAOP00005027728.1
Yponomeuta cagnagella	ENSEAOP00005028871.1
Yponomeuta cagnagella	ENSEAOP00005029257.1
Zeuzera pyrina	BRAKERZPYP00000000300.1
Zeuzera pyrina	BRAKERZPYP00000001199.1
Zeuzera pyrina	BRAKERZPYP00000004764.1
Zeuzera pyrina	BRAKERZPYP00000006585.1
Zeuzera pyrina	BRAKERZPYP00000007212.1
Zeuzera pyrina	BRAKERZPYP00000007276.1
Zeuzera pyrina	BRAKERZPYP00000007376.1
Zeuzera pyrina	BRAKERZPYP00000007389.1
Zeuzera pyrina	BRAKERZPYP00000007402.1
Zeuzera pyrina	BRAKERZPYP00000007458.1
Zeuzera pyrina	BRAKERZPYP00000007461.1
Zeuzera pyrina	BRAKERZPYP00000007587.1
Zeuzera pyrina	BRAKERZPYP00000007596.1
Zeuzera pyrina	BRAKERZPYP00000007627.1
Zeuzera pyrina	BRAKERZPYP00000007674.1
Zeuzera pyrina	BRAKERZPYP00000007714.1
Zeuzera pyrina	BRAKERZPYP00000007780.1
Zeuzera pyrina	BRAKERZPYP00000007843.1
Zeuzera pyrina	BRAKERZPYP00000007945.1
Zeuzera pyrina	BRAKERZPYP00000008004.1
Zeuzera pyrina	BRAKERZPYP00000008017.1
Zeuzera pyrina	BRAKERZPYP00000010324.1
Zeuzera pyrina	BRAKERZPYP00000011905.1
Zeuzera pyrina	BRAKERZPYP00000012195.1
Zeuzera pyrina	BRAKERZPYP00000012272.1
Zeuzera pyrina	BRAKERZPYP00000012278.1
Zeuzera pyrina	BRAKERZPYP00000012590.1
Zeuzera pyrina	BRAKERZPYP00000012700.1
Zeuzera pyrina	BRAKERZPYP00000012761.1
Zeuzera pyrina	BRAKERZPYP00000018044.1
Zeuzera pyrina	BRAKERZPYP00000020286.1
Zeuzera pyrina	BRAKERZPYP00000020479.1
Zeuzera pyrina	BRAKERZPYP00000020652.1
Zeuzera pyrina	BRAKERZPYP00000020681.1
Zeuzera pyrina	BRAKERZPYP00000020917.1
Zeuzera pyrina	BRAKERZPYP00000021146.1
Zeuzera pyrina	BRAKERZPYP00000021362.1
Zeuzera pyrina	BRAKERZPYP00000021453.1
Zeuzera pyrina	BRAKERZPYP00000021525.1
Zeuzera pyrina	BRAKERZPYP00000021820.1
Zygaena filipendulae	ENSZFIP00015000348.1
Zygaena filipendulae	ENSZFIP00015000398.1
Zygaena filipendulae	ENSZFIP00015000935.1
Zygaena filipendulae	ENSZFIP00015001619.1
Zygaena filipendulae	ENSZFIP00015002671.1
Zygaena filipendulae	ENSZFIP00015002841.1
Zygaena filipendulae	ENSZFIP00015002879.1
Zygaena filipendulae	ENSZFIP00015002893.1
Zygaena filipendulae	ENSZFIP00015003573.1
Zygaena filipendulae	ENSZFIP00015003652.1
Zygaena filipendulae	ENSZFIP00015003863.1
Zygaena filipendulae	ENSZFIP00015004004.1
Zygaena filipendulae	ENSZFIP00015004058.1
Zygaena filipendulae	ENSZFIP00015004079.1
Zygaena filipendulae	ENSZFIP00015004258.1
Zygaena filipendulae	ENSZFIP00015004284.1
Zygaena filipendulae	ENSZFIP00015004347.1
Zygaena filipendulae	ENSZFIP00015004364.1
Zygaena filipendulae	ENSZFIP00015004458.1
Zygaena filipendulae	ENSZFIP00015005492.1
Zygaena filipendulae	ENSZFIP00015007044.1
Zygaena filipendulae	ENSZFIP00015009016.1
Zygaena filipendulae	ENSZFIP00015010305.1
Zygaena filipendulae	ENSZFIP00015010694.1
Zygaena filipendulae	ENSZFIP00015014141.1
Zygaena filipendulae	ENSZFIP00015018662.1
Zygaena filipendulae	ENSZFIP00015019853.1
