# Supplementary material for: Convergent evolution of hexenal isomerases in Lepidoptera and plants
Source: Nat Ecol Evol. 2026 Feb 27;10(4):807–19. doi: 10.1038/s41559-026-02999-2 (PMC13076199; doi:10.1038/s41559-026-02999-2)
Supplement: Supplementary file 5 — Sequence sources and quality assessment of plant datasets used for phylogenetic analysis. [file 41559_2026_2999_MOESM5_ESM.xlsx]

## Sheet: S2A
Lineages	Phylum	Clade/Class	Taxon	Taxid	Data type	Protein count	Data source	BUSCO score
Viridiplantae	Chlorophyta	core chlorophytes	Auxenochlorella protothecoides Strain: 0710	3075	Genomic (reference proteome)	7001	UP000028924	C:72.2%[S:71.3%,D:0.9%],F:14.8%,M:13.0%,n:425
			Asterochloris sp. Cgr/DA1pho	763042	Genomic	10025	JGI	C:73.9%[S:69.9%,D:4.0%],F:14.8%,M:11.3%,n:425
			Chlamydomonas eustigma Strain: NIES-2499	1157962	Genomic (reference proteome)	14139	UP000232323	C:85.4%[S:80.2%,D:5.2%],F:6.8%,M:7.8%,n:425
			Chlamydomonas reinhardtii Strain: CC-503	3055	Genomic (reference proteome)	18829	UP000006906	C:91.5%[S:86.8%,D:4.7%],F:4.2%,M:4.3%,n:425
			Chlamydomonas incerta Strain: SAG 7.73	51695	Genomic	16957	NCBI(GCA_016834605.1)	C:87.3%[S:84.2%,D:3.1%],F:7.1%,M:5.6%,n:425
			Edaphochlamys debaryana Strain: CCAP 11/70	47281	Genomic	20450	NCBI(GCA_016858145.1)	C:89.2%[S:83.3%,D:5.9%],F:5.6%,M:5.2%,n:425
			Astrephomene gubernaculifera NIES-4017	47775	Genomic	13713	NCBI(GCA_021605115.1)	C:67.1%[S:65.9%,D:1.2%],F:14.8%,M:18.1%,n:425
			Coccomyxa subellipsoidea strain C-169	574566	Genomic (reference proteome)	9799	UP000007264	C:77.4%[S:76.2%,D:1.2%],F:9.6%,M:13.0%,n:425
			Coccomyxa sp. Obi	2315456	Genomic	11588	NCBI(GCA_020887355.1)	C:91.8%[S:90.4%,D:1.4%],F:3.3%,M:4.9%,n:425
			Chlorella variabilis Strain: NC64A	554065	Genomic (reference proteome)	9831	UP000008141	C:84.4%[S:83.5%,D:0.9%],F:8.2%,M:7.4%,n:425
			Chlorella vulgaris	3077	Genomic (genes predicted by AUGUSTU)	7908	NCBI(GCA_009720205.1)	C:79.7%[S:79.5%,D:0.2%],F:8.5%,M:11.8%,n:425
			Chlorella sorokiniana Strain: UTEX 1602	3076	Genomic (reference proteome)	10201	UP000239899	C:92.3%[S:87.1%,D:5.2%],F:3.3%,M:4.4%,n:425
			Chlorella desiccata Strain: UTEX 2526	1650286	Genomic	9552	NCBI(GCA_019044685.2)	C:88.9%[S:81.6%,D:7.3%],F:4.7%,M:6.4%,n:425
			Chromochloris zofingiensis SAG 211-14	31302	Genomic	15274	JGI	C:78.1%[S:75.3%,D:2.8%],F:12.5%,M:9.4%,n:425
			Monoraphidium neglectum Strain: SAG 48.87	145388	Genomic (reference proteome)	16738	UP000054498	C:57.6%[S:56.0%,D:1.6%],F:29.4%,M:13.0%,n:425
			Micractinium conductrix Strain: SAG 241.80	554055	Genomic (reference proteome)	9815	UP000239649	C:89.4%[S:82.6%,D:6.8%],F:4.7%,M:5.9%,n:425
			Raphidocelis subcapitata Strain: NIES-3	307507	Genomic (reference proteome)	13347	UP000247498	C:86.1%[S:84.2%,D:1.9%],F:7.8%,M:6.1%,n:425
			Symbiochloris reticulata	40981	Genomic	12582	JGI(1016105)	C:78.1%[S:76.5%,D:1.6%],F:12.7%,M:9.2%,n:425
			Trebouxia sp. A1-2	2608996	Genomic	13740	UP000323438	C:74.5%[S:72.9%,D:1.6%],F:10.4%,M:15.1%,n:425
			Dunaliella salina strain:CCAP 19/18	3046	Genomic	18740	NCBI(NSFN00000000.2)	C:56.7%[S:49.2%,D:7.5%],F:25.2%,M:18.1%,n:425
			Gonium pectorale	33097	Genomic (reference proteome)	16224	UP000075714	C:64.5%[S:62.6%,D:1.9%],F:18.8%,M:16.7%,n:425
			Volvox carteri f. nagariensis Strain: f. Nagariensis / Eve	3068	Genomic (reference proteome)	14335	UP000001058	C:84.2%[S:83.3%,D:0.9%],F:7.3%,M:8.5%,n:425
			Volvox africanus Strain: NIES-3780	51714	Genomic	23850	NCBI(GCA_019650175.1)	C:78.6%[S:65.9%,D:12.7%],F:5.2%,M:16.2%,n:425
			Volvox reticuliferus Strain: NIES-3785	1737510	Genomic	22374	NCBI(GCA_019650235.1)	C:81.4%[S:69.2%,D:12.2%],F:4.7%,M:13.9%,n:425
			Tetradesmus obliquus	3088	Genomic (reference proteome)	18538	UP000256970	C:85.6%[S:72.9%,D:12.7%],F:4.2%,M:10.2%,n:425
			Scenedesmus sp. NREL 46B-D3	2650976	Genomic	17318	UP000588193	C:75.7%[S:73.6%,D:2.1%],F:13.6%,M:10.7%,n:425
			Scenedesmus quadricauda	3089	Genomic (genes predicted by AUGUSTU)	14142	Besova	C:83.8%[S:77.2%,D:6.6%],F:6.8%,M:9.4%,n:425
		Mamiellophyceae	Ostreococcus tauri Strain: OTTH0595	70448	Genomic (reference proteome)	7745	UP000009170	C:84.0%[S:82.1%,D:1.9%],F:4.2%,M:11.8%,n:425
			Ostreococcus lucimarinus Strain: CCE9901	436017	Genomic (reference proteome)	7403	UP000001568	C:74.4%[S:72.0%,D:2.4%],F:10.1%,M:15.5%,n:425
			Bathycoccus prasinos Strain: RCC 1105	41875	Genomic (reference proteome)	7886	UP000198341	C:74.1%[S:71.3%,D:2.8%],F:6.4%,M:19.5%,n:425
			Micromonas commoda strain RCC299 / NOUM17 / CCMP2709	296587	Genomic (reference proteome)	10115	UP000002009	C:83.3%[S:80.9%,D:2.4%],F:9.6%,M:7.1%,n:425
			Micromonas pusilla strain CCMP1545	564608	Genomic (reference proteome)	10250	UP000001876	C:76.3%[S:74.4%,D:1.9%],F:12.0%,M:11.7%,n:425
		Chloropicophyceae	Chloropicon primus Strain: CCMP1205	1764295	Genomic (reference proteome)	8606	UP000316726	C:76.0%[S:74.6%,D:1.4%],F:5.2%,M:18.8%,n:425
		Ulvophyceae	Ulva mutabilis	498180	Genomic	12920	JGI	C:76.7%[S:74.8%,D:1.9%],F:7.3%,M:16.0%,n:425
			Ostreobium quekettii	121088	Genomic	10833	NCBI(GCA_905146915.1)	C:52.2%[S:48.0%,D:4.2%],F:9.2%,M:38.6%,n:425
		Pedinophyceae	Pedinophyceae sp. YPF-701	765719	Genomic	7940	NCBI(GCA_916048055.1)	C:76.2%[S:74.8%,D:1.4%],F:4.5%,M:19.3%,n:425
		Prasinophyte incertae sedis	Prasinoderma coloniale CCMP1413	156133	Genomic	7139	JGI	C:70.6%[S:69.2%,D:1.4%],F:5.4%,M:24.0%,n:425
		Palmophyllophyceae	Prasinococcaceae sp. CCMP 1430	2489100	Genomic	1596	NCBI(RQSC01)	C:67.6%[S:65.2%,D:2.4%],F:13.4%,M:19.0%,n:425
		Picocystophyceae	Picocystis sp. L7	2315764	Genomic	1382	NCBI(GCA_003665715.1)	C:73.0%[S:50.6%,D:22.4%],F:5.2%,M:21.8%,n:425
	Streptophyta	Andreaeopsida	Andreaea rupestris	13797	Transcriptomic	16283	1KP (WOGB)	C:75.7%[S:67.5%,D:8.2%],F:17.4%,M:6.9%,n:425
		Bryopsida	Physcomitrium patens	3218	Genomic	48022	NCBI(GCA_000002425.2)	C:98.3%[S:54.1%,D:44.2%],F:0.0%,M:1.7%,n:425
			Ceratodon purpureus	3225	Genomic	40806	NCBI(GCA_014871385.1)	C:97.2%[S:70.4%,D:26.8%],F:0.5%,M:2.3%,n:425
			Sphagnum fallax	53036	Genomic	45611	NcBI(GCA_021442195.1)	C:98.4%[S:55.1%,D:43.3%],F:0.2%,M:1.4%,n:425
			Pleurozium schreberi	34163	Genomic	2022	NCBI(GCA_006891605.1)	C:67.0%[S:63.5%,D:3.5%],F:19.5%,M:13.5%,n:425
			Pohlia nutans	140635	Genomic	2963	NCBI(GCA_022496805.1)	C:97.6%[S:9.6%,D:88.0%],F:0.7%,M:1.7%,n:425
			Syntrichia caninervis	200751	Genomic	3047	NCBI (GCA_016097705.1)	C:92.4%[S:84.9%,D:7.5%],F:4.0%,M:3.6%,n:425
			Philonotis fontana	67415	Transcriptomic	17434	1KP (ORKS)	C:79.1%[S:71.1%,D:8.0%],F:11.3%,M:9.6%,n:425
			Aulacomnium heterostichum	171832	Transcriptomic	19721	1KP (WNGH)	C:77.8%[S:65.6%,D:12.2%],F:15.1%,M:7.1%,n:425
			Bryum argenteum	37413	Transcriptomic	14189	1KP (JMXW)	C:57.4%[S:53.4%,D:4.0%],F:21.2%,M:21.4%,n:425
			Plagiomnium insigne	259530	Transcriptomic	15124	1KP (BGXB)	C:62.1%[S:56.9%,D:5.2%],F:24.2%,M:13.7%,n:425
			Buxbaumia aphylla	70128	Transcriptomic	15197	1KP (HRWG)	C:73.6%[S:64.0%,D:9.6%],F:18.4%,M:8.0%,n:425
			Dicranum scoparium	3222	Transcriptomic	18000	1KP (NGTD)	C:70.6%[S:65.2%,D:5.4%],F:16.7%,M:12.7%,n:425
			Leucobryum albidum	175169	Transcriptomic	20616	1KP (VMXJ)	C:82.9%[S:72.5%,D:10.4%],F:9.6%,M:7.5%,n:425
			Diphyscium foliosum	82928	Transcriptomic	17288	1KP (AWOI)	C:74.1%[S:65.2%,D:8.9%],F:16.2%,M:9.7%,n:425
			Encalypta streptocarpa	81092	Transcriptomic	17971	1KP (KEFD)	C:59.3%[S:52.2%,D:7.1%],F:25.9%,M:14.8%,n:425
			Rosulabryum capillare	99387	Transcriptomic	15212	1KP (XWHK)	C:52.7%[S:45.9%,D:6.8%],F:22.6%,M:24.7%,n:425
			Racomitrium elongatum	71396	Transcriptomic	16274	1KP (ABCD)	C:62.1%[S:54.8%,D:7.3%],F:24.2%,M:13.7%,n:425
			Scouleria aquatica	67421	Transcriptomic	21228	1KP (BPSG)	C:78.8%[S:62.6%,D:16.2%],F:13.6%,M:7.6%,n:425
			Hedwigia ciliata	52988	Transcriptomic	16533	1KP (YWNF)	C:82.1%[S:71.5%,D:10.6%],F:12.0%,M:5.9%,n:425
			Rhynchostegium serrulatum	283383	Transcriptomic	15387	1KP (JADL)	C:71.5%[S:64.9%,D:6.6%],F:18.1%,M:10.4%,n:425
			Calliergon cordifolium	671105	Transcriptomic	17282	1KP (TAVP)	C:65.9%[S:53.9%,D:12.0%],F:20.5%,M:13.6%,n:425
			Fontinalis antipyretica	67435	Transcriptomic	16479	1KP (DHWX)	C:58.1%[S:50.8%,D:7.3%],F:21.6%,M:20.3%,n:425
			Loeskeobryum brevirostre	94452	Transcriptomic	14293	1KP (WSPM)	C:61.2%[S:54.6%,D:6.6%],F:19.1%,M:19.7%,n:425
			Leucodon brachypus	94541	Transcriptomic	17755	1KP (ZACW)	C:84.0%[S:73.2%,D:10.8%],F:10.8%,M:5.2%,n:425
			Neckera douglasii	140378	Transcriptomic	21502	1KP (TMAJ)	C:82.4%[S:72.5%,D:9.9%],F:9.4%,M:8.2%,n:425
			Pseudotaxiphyllum elegans	186706	Transcriptomic	15538	1KP (QKQO)	C:81.8%[S:72.9%,D:8.9%],F:11.3%,M:6.9%,n:425
			Stereodon subimponens	1671329	Transcriptomic	16033	1KP (LNSF)	C:67.8%[S:60.0%,D:7.8%],F:16.9%,M:15.3%,n:425
			Thuidium delicatulum	94606	Transcriptomic	13611	1KP (EEMJ)	C:52.5%[S:49.2%,D:3.3%],F:27.8%,M:19.7%,n:425
			Claopodium rostratum	2604102	Transcriptomic	15570	1KP (VBMM)	C:84.2%[S:75.3%,D:8.9%],F:8.9%,M:6.9%,n:425
			Pseudanomodon attenuatus	2779804	Transcriptomic	15290	1KP (QMWB)	C:70.1%[S:64.7%,D:5.4%],F:19.3%,M:10.6%,n:425
			Pulvigera lyellii	61563	Transcriptomic	16761	1KP (CMEQ)	C:82.3%[S:74.1%,D:8.2%],F:11.3%,M:6.4%,n:425
			Timmia austriaca	108613	Transcriptomic	19441	1KP (ZQRI)	C:72.5%[S:63.3%,D:9.2%],F:17.9%,M:9.6%,n:425
		Polytrichopsida	Atrichum angustatum	37310	Transcriptomic	18142	1KP (ZTHV)	C:68.4%[S:61.6%,D:6.8%],F:18.6%,M:13.0%,n:425
			Polytrichum commune	3213	Transcriptomic	10856	1KP (SZYG)	C:50.6%[S:48.5%,D:2.1%],F:22.4%,M:27.0%,n:425
		Takakiopsida	Takakia lepidozioides	37425	Transcriptomic	14618	1KP (SKQD)	C:73.7%[S:66.6%,D:7.1%],F:16.0%,M:10.3%,n:425
		Tetraphidopsida	Tetraphis pellucida	37420	Transcriptomic	23234	1KP (HVBQ)	C:66.8%[S:60.2%,D:6.6%],F:22.1%,M:11.1%,n:425
		Lycopodiopsida (spike moss)	Selaginella moellendorffii	88036	Genomic	33150	NCBI (GCF_000143415)	C:97.6%[S:4.7%,D:92.9%],F:0.5%,M:1.9%,n:425
			Selaginella kraussiana	81964	Genomic	2617	NCBI (GCA_001021135.1)	C:81.2%[S:78.6%,D:2.6%],F:12.5%,M:6.3%,n:425
			Selaginella tamariscina	137178	Genomic	2866	NCBI (GCA_003024785.1)	C:87.3%[S:72.2%,D:15.1%],F:7.5%,M:5.2%,n:425
			Selaginella acanthonota	1715361	Transcriptomic	12635	1KP (ZYCD)	C:62.3%[S:57.6%,D:4.7%],F:14.6%,M:23.1%,n:425
			Selaginella lepidophylla	59777	Transcriptomic	14486	1KP (ABIJ)	C:60.3%[S:56.5%,D:3.8%],F:16.0%,M:23.7%,n:425
		Lycopodiopsida (clubmoss)	Phlegmariurus myrsinites	1799590	Transcriptomic	15374	1KP (CBAE)	C:54.4%[S:50.6%,D:3.8%],F:20.5%,M:25.1%,n:425
			Phylloglossum drummondii	70003	Transcriptomic	22326	1KP (ZZEI)	C:55.7%[S:50.1%,D:5.6%],F:26.4%,M:17.9%,n:425
			Dendrolycopodium obscurum	62333	Transcriptomic	14712	1KP (XNXF)	C:57.9%[S:53.4%,D:4.5%],F:23.3%,M:18.8%,n:425
			Diphasiastrum digitatum	13841	Transcriptomic	15645	1KP (WAFT)	C:62.4%[S:57.2%,D:5.2%],F:21.9%,M:15.7%,n:425
			Huperzia lucidula	37429	Transcriptomic	18903	1KP (GKAG)	C:69.0%[S:63.8%,D:5.2%],F:21.6%,M:9.4%,n:425
			Spinulum annotinum	13840	Transcriptomic	16977	1KP (ENQF)	C:62.1%[S:56.2%,D:5.9%],F:24.0%,M:13.9%,n:425
			Lycopodium deuterodensum	73627	Transcriptomic	17995	1KP (PQTO)	C:67.6%[S:60.5%,D:7.1%],F:23.3%,M:9.1%,n:425
			Pseudolycopodiella caroliniana	89042	Transcriptomic	17035	1KP (UPMJ)	C:65.6%[S:60.0%,D:5.6%],F:20.7%,M:13.7%,n:425
		Lycopodiopsida (quillwort)	Isoetes taiwanensis	99432	Genomic	8475	NCBI (GCA_021234155.1)	C:91.0%[S:72.2%,D:18.8%],F:4.5%,M:4.5%,n:425
			Isoetes engelmannii	37427	Genomic	12452	NCBI (GCA_011763485.1)	C:86.9%[S:78.4%,D:8.5%],F:11.1%,M:2.0%,n:425
			Isoetes tegetiformans	264945	Transcriptomic	17905	1KP (PKOX)	C:86.1%[S:81.9%,D:4.2%],F:10.6%,M:3.3%,n:425
		Marchantiophyta	Marchantia polymorpha Strain: Tak-1	3197	Genomic (reference proteome)	21856	UP000244005	C:96.7%[S:86.6%,D:10.1%],F:0.7%,M:2.6%,n:425
			Marchantia papillata subsp. Grossibarba	1920708	Genomic (reference proteome)	1920708	UP000077202	C:91.3%[S:91.3%,D:0.0%],F:4.0%,M:4.7%,n:425
			Conocephalum conicum	41839	Transcriptomic	11804	1KP (ILBQ)	C:77.7%[S:71.3%,D:6.4%],F:14.6%,M:7.7%,n:425
		Jungermanniopsida	Odontoschisma prostratum	526359	Transcriptomic	16825	1KP (YBQN)	C:63.3%[S:55.8%,D:7.5%],F:21.6%,M:15.1%,n:425
			Bazzania trilobata	13808	Transcriptomic	14331	1KP (WZYK)	C:61.6%[S:54.1%,D:7.5%],F:19.8%,M:18.6%,n:425
			Porella pinnata	56943	Transcriptomic	17557	1KP (UUHD)	C:61.1%[S:55.5%,D:5.6%],F:22.6%,M:16.3%,n:425
			Ptilidium ciliare	139839	Transcriptomic	17052	1KP (HPXA)	C:60.0%[S:55.8%,D:4.2%],F:24.0%,M:16.0%,n:425
			Barbilophozia barbata	209798	Transcriptomic	17765	1KP (OFTV)	C:54.8%[S:46.8%,D:8.0%],F:24.2%,M:21.0%,n:425
			Scapania nemorea	41848	Transcriptomic	22250	1KP (IRBN)	C:83.1%[S:71.8%,D:11.3%],F:8.5%,M:8.4%,n:425
			Metzgeria crassipilis	1408784	Transcriptomic	14667	1KP (NRWZ)	C:65.7%[S:61.2%,D:4.5%],F:17.6%,M:16.7%,n:425
		Klebsormidiophyceae	Klebsormidium nitens Strain: NIES-2285	105231	Genomic (reference proteome)	16251	UP000054558	C:97.0%[S:96.5%,D:0.5%],F:1.9%,M:1.1%,n:425
		Charophyceae	Chara braunii Strain: S276	69332	Genomic (reference proteome)	35576	UP000265515	C:72.2%[S:65.4%,D:6.8%],F:11.5%,M:16.3%,n:425
		Anthocerotophyta	Anthoceros angustus	48387	Genomic	1884	NCBI (GCA_010909165.1)	C:91.1%[S:89.2%,D:1.9%],F:4.7%,M:4.2%,n:425
			Megaceros flagellaris	263821	Transcriptomic	11978	1KP (UCRN)	C:69.9%[S:50.1%,D:19.8%],F:5.4%,M:24.7%,n:425
			Phaeoceros carolinianus	185665	Transcriptomic	17831	1KP (WCZB)	C:76.2%[S:61.4%,D:14.8%],F:6.1%,M:17.7%,n:425
		Leiosporocerotopsida	Leiosporoceros dussii	263836	Transcriptomic	8876	1KP (ANON)	C:63.0%[S:41.6%,D:21.4%],F:4.0%,M:33.0%,n:425
		Zygnemophyceae	Spirogloea muscicola	2576442	Genomic	2501	NCBI (GCA_009602725.1)	:82.1%[S:16.0%,D:66.1%],F:11.3%,M:6.6%,n:425
			Penium margaritaceum	102169	Genomic	34653	NCBI (GCA_023375785.1)	C:51.8%[S:29.9%,D:21.9%],F:29.2%,M:19.0%,n:425
			Mesotaenium endlicherianum	184485	Genomic	2789	NCBI (GCA_009602735.1)	C:71.0%[S:68.9%,D:2.1%],F:19.8%,M:9.2%,n:425
		Chlorokybophyceae	Chlorokybus atmophyticus	3144	Genomic	1396	NCBI (GCA_009103225.1)	C:69.8%[S:68.9%,D:0.9%],F:13.9%,M:16.3%,n:425
		Gnetopsida	Gnetum montanum	3381	Genomic	17206	NCBI (GCA_015680685.1)	C:55.3%[S:52.9%,D:2.4%],F:4.2%,M:40.5%,n:425
			Welwitschia mirabilis	3377	Transcriptomic	15669	1KP (TOXE)	C:79.5%[S:75.3%,D:4.2%],F:12.2%,M:8.3%,n:425
		Pinopsida	Thuja plicata	3316	Genomic	65809	JGI	C:96.0%[S:54.1%,D:41.9%],F:3.3%,M:0.7%,n:42
			Amentotaxus argotaenia	25625	Transcriptomic	17575	1KP (IAJW)	C:74.1%[S:68.2%,D:5.9%],F:17.9%,M:8.0%,n:425
			Abies lasiocarpa	34340	Transcriptomic	18006	1KP (VSRH)	C:82.3%[S:77.4%,D:4.9%],F:12.7%,M:5.0%,n:425
			Sciadopitys verticillata	28979	Transcriptomic	14914	1KP (YFZK)	C:77.2%[S:72.7%,D:4.5%],F:12.2%,M:10.6%,n:425
		Cycadopsida	Cycas micholitzii	182486	Transcriptomic	13269	1KP (XZUY)	C:61.2%[S:57.4%,D:3.8%],F:21.9%,M:16.9%,n:425
			Stangeria eriopus	34343	Transcriptomic	17316	1KP (KAWQ)	C:67.3%[S:63.1%,D:4.2%],F:22.6%,M:10.1%,n:425
			Dioon edule	58033	Transcriptomic	15416	1KP (WLIC)	C:56.9%[S:52.7%,D:4.2%],F:22.4%,M:20.7%,n:425
		Polypodiopsida (ferns a &Horsetails)	Ceratopteris richardii	49495	Genomic	75211	NCBI (GCA_020310875.1)	C:94.8%[S:41.6%,D:53.2%],F:3.5%,M:1.7%,n:425
			Psilotum nudum	3240	Transcriptomic	13462	1KP (QVMR)	C:56.3%[S:52.5%,D:3.8%],F:22.1%,M:21.6%,n:425
			Danaea nodosa	491836	Transcriptomic	15643	1KP (DFHO)	C:84.7%[S:81.2%,D:3.5%],F:8.5%,M:6.8%,n:425
			Sceptridium dissectum	93613	Transcriptomic	19576	1KP (EEAQ)	C:79.1%[S:72.5%,D:6.6%],F:15.8%,M:5.1%,n:425
			Botrypus virginianus	167744	Transcriptomic	17653	1KP (BEGM)	C:51.0%[S:44.2%,D:6.8%],F:25.4%,M:23.6%,n:425
			Equisetum hyemale	3262	Transcriptomic	18169	1KP (JVSZ)	C:66.8%[S:61.4%,D:5.4%],F:22.6%,M:10.6%,n:425
			Culcita macrocarpa	361541	Transcriptomic	22348	1KP (PNZO)	C:53.9%[S:47.3%,D:6.6%],F:24.2%,M:21.9%,n:425
			Plagiogyria japonica	32161	Transcriptomic	22964	1KP (UWOD)	C:62.6%[S:58.4%,D:4.2%],F:22.8%,M:14.6%,n:425
			Plenasium javanicum	90695	Transcriptomic	15176	1KP (VIBO)	C:86.8%[S:82.1%,D:4.7%],F:7.8%,M:5.4%,n:425
			Homalosorus pycnocarpos	86699	Transcriptomic	15352	1KP (OCZL)	C:59.8%[S:56.5%,D:3.3%],F:18.8%,M:21.4%,n:425
			Pilularia globulifera	49509	Transcriptomic	18491	1KP (KIIX)	C:73.9%[S:66.8%,D:7.1%],F:18.1%,M:8.0%,n:425
			Anemia tomentosa	148559	Transcriptomic	19164	1KP (CQPW)	C:59.3%[S:50.1%,D:9.2%],F:25.2%,M:15.5%,n:425
	Angiospermae	ANA clade (early-diverging angiosperms)	Nymphaea colorata	210225	Genomic	33500	NCBI (GCF_008831285.1)	C:99.3%[S:60.2%,D:39.1%],F:0.0%,M:0.7%,n:425
			Amborella trichopoda	13333	Genomic (reference proteome)	27371	UP000017836	C:95.3%[S:94.1%,D:1.2%],F:3.5%,M:1.2%,n:425
	Mesangiospermae	Magnoliopsida	Aristolochia fimbriata	158543	Genomic	21855	NCBI (GCA_019845555.1)	C:98.3%[S:97.4%,D:0.9%],F:0.9%,M:0.8%,n:425
			Cinnamomum micranthum f. kanehirae	337451	Genomic	26531	NCBI (GCA_003546025.1)	C:89.6%[S:84.2%,D:5.4%],F:3.5%,M:6.9%,n:425
			Chimonanthus praecox	13419	Genomic	2583	NCBI (GCA_022113865.1)	C:99.5%[S:90.1%,D:9.4%],F:0.0%,M:0.5%,n:425
			Magnolia officinalis	85864	Genomic	7211	NCBI (GCA_021015155.1)	C:88.4%[S:84.2%,D:4.2%],F:4.0%,M:7.6%,n:425
		Eudicot	Arabidopsis thaliana Strain: cv. Columbia	3702	Genomic (reference proteome)	39337	UP000006548	C:99.7%[S:67.5%,D:32.2%],F:0.0%,M:0.3%,n:425
			Chenopodium quinoa	63459	Genomic (reference proteome)	33949	UP000596660	C:88.5%[S:49.4%,D:39.1%],F:4.0%,M:7.5%,n:425
			Solanum lycopersicum	4081	Genomic (reference proteome)	34655	UP000004994	C:93.7%[S:92.5%,D:1.2%],F:4.7%,M:1.6%,n:425
			Solanum tuberosum	4113	Genomic (reference proteome)	53105	UP000011115	C:81.8% (S:61.9% D:19.8%) F:2.7% M:15.5%
			Coffea arabica	13443	Genomic (reference proteome)	53278	UP000515148	C:98.3%[S:24.7%,D:73.6%],F:0.9%,M:0.8%,n:425
			Helianthus annuus	4232	Genomic (reference proteome)	51240	UP000215914	C:97.4%[S:88.9%,D:8.5%],F:1.2%,M:1.4%,n:425
			Eucalyptus grandis	71139	Genomic (reference proteome)	44150	UP000030711	C:93.8%[S:64.2%,D:29.6%],F:4.0%,M:2.2%,n:425
			Vitis vinifera	29760	Genomic (reference proteome)	29906	UP000009183	C:96.2%[S:94.6%,D:1.6%],F:2.8%,M:1.0%,n:425
			Cicer arietinum	3827	Genomic (reference proteome)	30622	UP000087171	C:100.0%[S:80.0%,D:20.0%],F:0.0%,M:0.0%,n:425
			Fragaria vesca	57918	Genomic	31387	NCBI (GCF_000184155.1)	C:99.0%[S:77.6%,D:21.4%],F:0.7%,M:0.3%,n:425
			Glycine max	3847	Genomic (reference proteome)	74863	UP000008827	C:99.6%[S:27.8%,D:71.8%],F:0.2%,M:0.2%,n:425
			Phaseolus vulgaris	3885	Genomic (reference proteome)	30501	UP000000226	C:97.1%[S:85.6%,D:11.5%],F:2.8%,M:0.1%,n:425
			Carya illinoinensis	32201	Genomic	54484	NCBI (GCF_018687715.1)	C:100.0%[S:53.9%,D:46.1%],F:0.0%,M:0.0%,n:425
			Vigna unguiculata	3917	Genomic (reference proteome)	39504	UP000501690	C:97.4%[S:95.5%,D:1.9%],F:1.9%,M:0.7%,n:425
			Manihot esculenta	3983	Genomic (reference proteome)	37399	UP000091857	C:96.9%[S:78.8%,D:18.1%],F:2.4%,M:0.7%,n:425
			Populus trichocarpa	3694	Genomic (reference proteome)	53336	UP000006729	C:98.4%[S:61.9%,D:36.5%],F:1.4%,M:0.2%,n:425
			Salix suchowensis	1278906	Genomic (reference proteome)	35776	UP000664337	C:97.1%[S:84.9%,D:12.2%],F:2.4%,M:0.5%,n:425
			Carica papaya	3649	Genomic	26103	NCBI (GCF_000150535.2)	C:83.3%[S:61.2%,D:22.1%],F:13.9%,M:2.8%,n:425
			Capsella rubella	81985	Genomic (reference proteome)	28039	UP000029121	C:95.0%[S:90.8%,D:4.2%],F:3.1%,M:1.9%,n:425
			Brassica rapa	51351	Genomic (reference proteome)	40809	UP000011750	C:98.1%[S:84.7%,D:13.4%],F:0.9%,M:1.0%,n:425
			Crambe hispanica	70124	Genomic	2584	NCBI (GCA_015476445.1)	C:98.8%[S:87.5%,D:11.3%],F:0.7%,M:0.5%,n:425
			Gossypium hirsutum	3635	Genomic (reference proteome)	76255	UP000189702	C:98.1%[S:19.5%,D:78.6%],F:0.5%,M:1.4%,n:425
			Citrus sinensis	85681	Genomic (reference proteome)	31273	UP000030687	C:96.0%[S:75.1%,D:20.9%],F:3.3%,M:0.7%,n:425
			Nicotiana attenuata Strain: cv. UT	49451	Genomic (reference proteome)	32840	UP000187609	C:95.5%[S:92.7%,D:2.8%],F:2.1%,M:2.4%,n:425
			Cephalotus follicularis Strain: cv. St1	3775	Genomic (reference proteome)	36397	UP000187406	C:98.3%[S:97.6%,D:0.7%],F:1.4%,M:0.3%,n:425
			Erigeron canadensis	72917	Genomic	34584	NCBI(GCF_010389155.1)	C:99.2%[S:77.6%,D:21.6%],F:0.5%,M:0.3%,n:425
			Rosa chinensis Strain: cv. Old Blush	74649	Genomic (reference proteome)	45026	UP000238479	C:97.9%[S:94.6%,D:3.3%],F:1.9%,M:0.2%,n:425
			Parasponia andersonii Strain: cv. WU1-14	3476	Genomic (reference proteome)	37181	UP000237105	C:95.8%[S:95.1%,D:0.7%],F:3.5%,M:0.7%,n:425
		Monocot	Oryza sativa	39947	Genomic (reference proteome)	59202	UP000000763	C:91.3%[S:75.5%,D:15.8%],F:7.1%,M:1.6%,n:425
			Brachypodium distachyon	15368	Genomic (reference proteome)	44826	UP000008810	C:99.5%[S:75.5%,D:24.0%],F:0.2%,M:0.3%,n:425
			Sorghum bicolor	4558	Genomic (reference proteome)	41380	UP000000768	C:99.3%[S:81.2%,D:18.1%],F:0.5%,M:0.2%,n:425
			Zea mays	4577	Genomic (reference proteome)	63235	UP000007305	C:98.1%[S:49.2%,D:48.9%],F:1.2%,M:0.7%,n:425
			Panicum hallii	1504633	Genomic (reference proteome)	38607	UP000244336	C:99.7%[S:81.6%,D:18.1%],F:0.2%,M:0.1%,n:425
			Eragrostis curvula cv. Victoria	38414	Genomic (reference proteome)	53658	UP000324897	C:93.9%[S:71.3%,D:22.6%],F:1.9%,M:4.2%,n:425
			Phoenix dactylifera	42345	Genomic (reference proteome)	39365	UP000228380	C:98.6%[S:60.7%,D:37.9%],F:0.7%,M:0.7%,n:425
			Cocos nucifera	13894	Genomic	28016	NCBI (GCA_008124465.1)	C:73.1%[S:67.5%,D:5.6%],F:16.9%,M:10.0%,n:425
			Elaeis guineensis	51953	Genomic	43551	NCBI (GCF_000442705.1)	C:99.8%[S:53.4%,D:46.4%],F:0.2%,M:0.0%,n:425
			Zingiber officinale	94328	Genomic	101860	NCBI (GCF_018446385.1)	C:99.8%[S:5.2%,D:94.6%],F:0.0%,M:0.2%,n:425
			Musa troglodytarum	320322	Genomic	78041	NCBI (GCA_023547065.1)	C:92.5%[S:47.8%,D:44.7%],F:5.6%,M:1.9%,n:425
			Lolium rigidum	89674	Genomic	39248	NCBI (GCF_022539505.1)	C:100.0%[S:74.4%,D:25.6%],F:0.0%,M:0.0%,n:425
			Hordeum vulgare subsp. Vulgare	112509	Genomic	40284	NCBI (GCF_904849725.1)	C:99.7%[S:74.1%,D:25.6%],F:0.2%,M:0.1%,n:425
			Eleusine coracana subsp. Coracana	191504	Genomic	57180	NCBI (GCA_021604985.1)	C:76.7%[S:40.7%,D:36.0%],F:16.5%,M:6.8%,n:425
			Digitaria exilis	1010633	Genomic	61938	NCBI (GCA_015342445.1)	C:96.2%[S:18.6%,D:77.6%],F:1.4%,M:2.4%,n:425
			Carex littledalei	544730	Genomic	22441	NCBI (GCA_011114355.1)	C:88.5%[S:81.2%,D:7.3%],F:2.6%,M:8.9%,n:425
						** Complete (C) [Single-copy (S), Duplicated (D)], Fragmented (F), Missing (M)

## Sheet: S2B
Cupin protein Subfamily	Species	Protein accession
Germin	Solanum tuberosum	NP 001275369.1
	Oryza sativa	NP 001395987.1
	Medicago truncatula	XP 013470283.1
	Zea mays	NP 001152473.1
	Arabidopsis thaliana	NP 193199.1
	Vitis vinifera	NP 001267944.1
	Glycine max	NP 001241457.1
	Arabidopsis thaliana	NP 187070.1
Vicilin	Medicago truncatula	XP 003624146.1
	Solanum lycopersicum	NP 001308118.1
	Cucumis sativus	XP 011650968.1
Globulin	Solanum lycopersicum	XP 004247523.1
	Apsicum baccatum	PHT52858.1
	Solanum tuberosum	XP 006351693.1
	Nicotiana sylvestris	XP 009783514.1
	Datura stramonium	MCD7472043.1
legumin	Populus trichocarpa	XP 002307645.3
	Solanum tuberosum	XP 006356113.1
	Solanum lycopersicum	XP 004234041.1
potential hexenal isomerase	Medicago truncatula	XP_003607149.1
		XP_003605501.1
		XP_003629975.1
		XP_003629976.2
	Medicago sativa	BAU98053.1
	Cucumis melo	XP 008461502.1
	Cucumis sativus	XP_004150394.1
		XP_011651276.2
		XP_004139714.3
		XP_004151504.1
	Cucurbita pepo	XP 023535755.1
	Benincasa hispida	XP 038897477.1

## Sheet: S2C
	Phylum	Clade/Class	Taxon	Taxid	potential Hi orthologs numbers	potential Hi orthologs ID	orthologs domain organization
	Chlorophyta	core chlorophytes	Auxenochlorella protothecoides Strain: 0710	3075	-
			Asterochloris sp. Cgr/DA1pho	763042	-
			Chlamydomonas eustigma Strain: NIES-2499	1157962	-
			Chlamydomonas reinhardtii Strain: CC-503	3055	-
			Chlamydomonas incerta Strain: SAG 7.73	51695	-
			Edaphochlamys debaryana Strain: CCAP 11/70	47281	-
			Astrephomene gubernaculifera NIES-4017	47775	-
			Coccomyxa subellipsoidea strain C-169	574566	-
			Coccomyxa sp. Obi	2315456	-
			Chlorella variabilis Strain: NC64A	554065	-
			Chlorella vulgaris	3077	-
			Chlorella sorokiniana Strain: UTEX 1602	3076	-
			Chlorella desiccata Strain: UTEX 2526	1650286	-
			Chromochloris zofingiensis SAG 211-14	31302	-
			Monoraphidium neglectum Strain: SAG 48.87	145388	-
			Micractinium conductrix Strain: SAG 241.80	554055	-
			Raphidocelis subcapitata Strain: NIES-3	307507	-
			Symbiochloris reticulata	40981	-
			Trebouxia sp. A1-2	2608996	-
			Dunaliella salina strain:CCAP 19/18	3046	-
			Gonium pectorale	33097	-
			Volvox carteri f. nagariensis Strain: f. Nagariensis / Eve	3068	-
			Volvox africanus Strain: NIES-3780	51714	-
			Volvox reticuliferus Strain: NIES-3785	1737510	-
			Tetradesmus obliquus	3088	-
			Scenedesmus sp. NREL 46B-D3	2650976	-
			Scenedesmus quadricauda	3089	-
		Mamiellophyceae	Ostreococcus tauri Strain: OTTH0595	70448	-
			Ostreococcus lucimarinus Strain: CCE9901	436017	-
			Bathycoccus prasinos Strain: RCC 1105	41875	-
			Micromonas commoda strain RCC299 / NOUM17 / CCMP2709	296587	-
			Micromonas pusilla strain CCMP1545	564608	-
		Chloropicophyceae	Chloropicon primus Strain: CCMP1205	1764295	-
		Ulvophyceae	Ulva mutabilis	498180	-
			Ostreobium quekettii	121088	-
		Pedinophyceae	Pedinophyceae sp. YPF-701	765719	-
		Prasinophyte incertae sedis	Prasinoderma coloniale CCMP1413	156133	-
		Palmophyllophyceae	Prasinococcaceae sp. CCMP 1430	2489100	-
		Picocystophyceae	Picocystis sp. L7	2315764	-
	Streptophyta	Andreaeopsida	Andreaea rupestris	13797	-
		Bryopsida	Physcomitrium patens	3218	-
			Ceratodon purpureus	3225	-
			Sphagnum fallax	53036	-
			Pleurozium schreberi	34163	-
			Pohlia nutans	140635	-
			Syntrichia caninervis	200751	-
			Philonotis fontana	67415	-
			Aulacomnium heterostichum	171832	-
			Bryum argenteum	37413	-
			Plagiomnium insigne	259530	-
			Buxbaumia aphylla	70128	-
			Dicranum scoparium	3222	-
			Leucobryum albidum	175169	-
			Diphyscium foliosum	82928	-
			Encalypta streptocarpa	81092	-
			Rosulabryum capillare	99387	-
			Racomitrium elongatum	71396	-
			Scouleria aquatica	67421	-
			Hedwigia ciliata	52988	-
			Rhynchostegium serrulatum	283383	-
			Calliergon cordifolium	671105	-
			Fontinalis antipyretica	67435	-
			Loeskeobryum brevirostre	94452	-
			Leucodon brachypus	94541	-
			Neckera douglasii	140378	1	scaffold-TMAJ-2173816_Neckera_douglasii	Cupin_1_3|Pfam_Cupin_1|hint_7|Pfam_Cupin_2|Pfam_Cupin_3
			Pseudotaxiphyllum elegans	186706	-
			Stereodon subimponens	1671329	-
			Thuidium delicatulum	94606	-
			Claopodium rostratum	2604102	-
			Pseudanomodon attenuatus	2779804	-
			Pulvigera lyellii	61563	-
			Timmia austriaca	108613	-
		Polytrichopsida	Atrichum angustatum	37310	-
			Polytrichum commune	3213	-
		Takakiopsida	Takakia lepidozioides	37425	-
		Tetraphidopsida	Tetraphis pellucida	37420	-
		Lycopodiopsida (spike moss)	Selaginella moellendorffii	88036	14	XP_002988282.2	Cupin_1_3|Pfam_Cupin_1|Pfam_Cupin_2|Pfam_Cupin_3|CPSase_L_D3_2|Pfam_CENP-C_C
						XP_024521566.1	Cupin_1_3|Pfam_Cupin_1|Pfam_Cupin_2|Pfam_Cupin_3|CPSase_L_D3_2|Pfam_CENP-C_C
						XP_002963879.2	Cupin_1_3|Pfam_Cupin_1|Pfam_Cupin_2|Pfam_Cupin_3|CPSase_L_D3_2|Pfam_CENP-C_C
						XP_002988902.1	Cupin_1_3|Pfam_Cupin_1|Pfam_Cupin_2|Pfam_Cupin_3|Pfam_KduI
						XP_024520927.1	Cupin_1_3|Pfam_Cupin_1|Pfam_Cupin_2|Pfam_Cupin_3|Pfam_RNA_pol_Rpc4|Pfam_DDHD|Pfam_Raftlin
						XP_024517780.1	Cupin_1_3|Pfam_Cupin_1|Pfam_Cupin_2|Pfam_Cupin_3|Pfam_RNA_pol_Rpc4|Pfam_DDHD|Pfam_Raftlin
						XP_002981671.2	Cupin_1_3|Pfam_Cupin_1|Pfam_Cupin_2|Pfam_ARD
						XP_024528575.1	Cupin_1_3|Pfam_Cupin_1|Pfam_Cupin_2|Pfam_Cupin_3|Pfam_ARD|Pfam_Utp8
						XP_024528572.1	Cupin_1_3|Pfam_Cupin_1|Pfam_Cupin_2|Pfam_Cupin_3|Pfam_ARD
						XP_024537810.1	Cupin_1_3|Pfam_Cupin_1|Pfam_Cupin_2|Pfam_Cupin_3|Pfam_DUF2375
						XP_024525862.1	Cupin_1_3|Pfam_Cupin_1|Pfam_Cupin_2|Pfam_Cupin_3|Pfam_DUF2375
						XP_002962697.1	Cupin_1_3|Pfam_Cupin_1|Pfam_Cupin_2|Pfam_CENP-C_C|Pfam_ARD|Pfam_Cupin_3|Pfam_AraC_binding
						XP_024541015.1	Pfam_Cupin_1|Cupin_1_3|Pfam_Cupin_2|Pfam_CENP-C_C|Pfam_AraC_binding
						XP_002980230.1	Cupin_1_3|Pfam_Cupin_1|Pfam_Cupin_2|Pfam_ARD|Pfam_CENP-C_C|Pfam_Cupin_3|Pfam_AraC_binding
			Selaginella kraussiana	81964	-
			Selaginella tamariscina	137178	-
			Selaginella acanthonota	1715361	4	scaffold-ZYCD-2007061_Selaginella_acanthonota	Cupin_1_3|Pfam_Cupin_1|Pfam_Cupin_2|Pfam_Cupin_3|Pfam_SLD5_C|Pfam_CENP-C_C
						scaffold-ZYCD-2035726_Selaginella_acanthonota	Cupin_1_3|Pfam_Cupin_1|Pfam_Cupin_2
						scaffold-ZYCD-2039379_Selaginella_acanthonota	Cupin_1_3|Pfam_Cupin_1|Pfam_Cupin_2|Pfam_Cupin_3
						scaffold-ZYCD-2038744_Selaginella_acanthonota	Cupin_1_3|Pfam_Cupin_1|Pfam_Cupin_3
						scaffold-ZYCD-2002696_Selaginella_acanthonota	Cupin_1_3|Pfam_Cupin_1|Pfam_Cupin_3
						scaffold-ZYCD-2039127_Selaginella_acanthonota	Cupin_1_3|Pfam_Cupin_1|Pfam_Cupin_2|Pfam_Cupin_3|Pfam_ARD
						scaffold-ZYCD-2003445_Selaginella_acanthonota	Cupin_1_3|Pfam_Cupin_1|Pfam_Cupin_2|Pfam_Cupin_3|Pfam_ARD|Pfam_CENP-C_C
						scaffold-ZYCD-2036589_Selaginella_acanthonota	Cupin_1_3|Pfam_Cupin_1|Pfam_Cupin_2|Pfam_tRNA_anti-codon|Pfam_GPI
			Selaginella lepidophylla	59777	3	scaffold-ABIJ-2033991_Selaginella_lepidophylla	Cupin_1_3|Pfam_Cupin_1|Pfam_Cupin_2|Pfam_Cupin_3|Pfam_ARD
						scaffold-ABIJ-2007460_Selaginella_lepidophylla	Cupin_1_3|Pfam_Cupin_1
						scaffold-ABIJ-2032237_Selaginella_lepidophylla	Cupin_1_3|Pfam_Cupin_1|Pfam_Cupin_2
		Lycopodiopsida (clubmoss)	Phlegmariurus myrsinites	1799590	1	scaffold-CBAE-2061010_Huperzia_myrsinites	Cupin_1_3|Pfam_Cupin_1|Pfam_Cupin_2|Pfam_Cupin_3|cupin_9|Pfam_ARD|Pfam_AraC_binding
			Phylloglossum drummondii	70003	8	scaffold-ZZEI-2020211_Phylloglossum_drummondii	Cupin_1_3|Pfam_Cupin_1|Pfam_Cupin_2|Pfam_Cupin_3|Pfam_ARD|Pfam_2OG-FeII_Oxy_3|Pfam_MannoseP_isomer
						scaffold-ZZEI-2013101_Phylloglossum_drummondii	Cupin_1_3|Pfam_Cupin_1|Pfam_Cupin_2|Pfam_ARD|Pfam_CENP-C_C|Pfam_Cupin_3|Pfam_AraC_binding
						scaffold-ZZEI-2020397_Phylloglossum_drummondii	Cupin_1_3|Pfam_Cupin_1|Pfam_Cupin_2|Pfam_Conotoxin|Pfam_DUF3886|Pfam_DUF3915
						scaffold-ZZEI-2024205_Phylloglossum_drummondii	Cupin_1_3|Pfam_Cupin_1|Pfam_Cupin_2
						scaffold-ZZEI-2013442_Phylloglossum_drummondii	Cupin_1_3|Pfam_Cupin_1|Pfam_Cupin_2|Pfam_CENP-C_C|Pfam_Galanin|Pfam_BRD4_CDT
						scaffold-ZZEI-2013441_Phylloglossum_drummondii	Cupin_1_3|Pfam_Cupin_1|Pfam_Cupin_2|Pfam_CENP-C_C|Pfam_Galanin
						scaffold-ZZEI-2013440_Phylloglossum_drummondii	Cupin_1_3|Pfam_Cupin_1|Pfam_Cupin_2|Pfam_CENP-C_C|Pfam_Galanin
						scaffold-ZZEI-2025574_Phylloglossum_drummondii	Cupin_1_3|Pfam_Cupin_1|Pfam_Cupin_2|Pfam_Cupin_3|cupin_9|Pfam_cNMP_binding|Pfam_DUF4287|cnmp_10
			Dendrolycopodium obscurum	62333	1	scaffold-XNXF-2010619_Dendrolycopodium_obscurum	Cupin_1_3|Pfam_Cupin_1|Pfam_Cupin_2|Pfam_Cupin_3|Pfam_AraC_binding|cupin_9|Pfam_TcfC|Pfam_ARD|cnmp_10
			Diphasiastrum digitatum	13841	5	caffold-WAFT-2068582_Diphasiastrum_digitatum	Cupin_1_3|Pfam_Cupin_1|Pfam_Cupin_2|Pfam_Cupin_3|Pfam_Cupin_6|Pfam_ARD|Pfam_CENP-C_C|Pfam_Glyco_hydro_42
						scaffold-WAFT-2003438_Diphasiastrum_digitatum	Cupin_1_3|Pfam_Cupin_1|Pfam_Cupin_2|Pfam_Cupin_3|Pfam_ARD|Pfam_CENP-C_C|Pfam_AraC_binding
						scaffold-WAFT-2003437_Diphasiastrum_digitatum	Cupin_1_3|Pfam_Cupin_1|Pfam_Cupin_2|Pfam_Cupin_3|Pfam_ARD|Pfam_CENP-C_C|Pfam_AraC_binding
						scaffold-WAFT-2010004_Diphasiastrum_digitatum	Cupin_1_3|Pfam_Cupin_1|Pfam_Cupin_2|Pfam_ARD|Pfam_Cupin_3|Pfam_CENP-C_C
						scaffold-WAFT-2014418_Diphasiastrum_digitatum	Cupin_1_3|Pfam_Cupin_1|Pfam_Cupin_2|Pfam_Cupin_3|Pfam_AraC_binding|cupin_9|Pfam_ARD|Pfam_GPI|Pfam_cNMP_binding|cnmp_10
			Huperzia lucidula	37429	1	scaffold-GKAG-2097520_Huperzia_lucidula	Cupin_1_3|Pfam_Cupin_1|Pfam_Cupin_2|Pfam_Cupin_3|Pfam_AraC_binding|cupin_9|Pfam_ARD
			Spinulum annotinum	13840	4	scaffold-ENQF-2004495_Lycopodium_annotinum	Cupin_1_3|Pfam_Cupin_1
						scaffold-ENQF-2074616_Lycopodium_annotinum	Cupin_1_3|Pfam_Cupin_1|Pfam_Cupin_2|Pfam_Cupin_3
						scaffold-ENQF-2002704_Lycopodium_annotinum	Cupin_1_3|Pfam_Cupin_1|Pfam_Cupin_2|Pfam_Cupin_3|Pfam_AraC_binding|Pfam_GPI|Pfam_tRNA_anti-codon|cupin_9|Pfam_ARD|Pfam_cNMP_binding|cnmp_10
						scaffold-ENQF-2002703_Lycopodium_annotinum	Cupin_1_3|Pfam_Cupin_1|Pfam_Cupin_2|Pfam_Cupin_3|Pfam_AraC_binding|Pfam_tRNA_anti-codon|Pfam_GPI|cupin_9|Pfam_ARD|Pfam_cNMP_binding|cnmp_10
			Lycopodium deuterodensum	73627	1	scaffold-PQTO-2081859_Lycopodium_deuterodensum	Cupin_1_3|Pfam_Cupin_1|Pfam_Cupin_2|Pfam_Cupin_3|cupin_9|Pfam_AraC_binding|cnmp_10|Pfam_cNMP_binding|Pfam_tRNA_anti-codon|Pfam_ARD
			Pseudolycopodiella caroliniana	89042	1	scaffold-UPMJ-2082204_Pseudolycopodiella_caroliniana	Cupin_1_3|Pfam_Cupin_1|Pfam_Cupin_2|Pfam_Cupin_3|Pfam_ARD|Pfam_AraC_binding|cupin_9
		Lycopodiopsida (quillwort)	Isoetes taiwanensis	99432	-
			Isoetes engelmannii	37427	-
			Isoetes tegetiformans	264945	8	scaffold-PKOX-2098225_Isoetes_tegetiformans	Cupin_1_3|Pfam_Cupin_1|Pfam_Cupin_2|Pfam_Cupin_3|Pfam_HTH_28|Pfam_AraC_binding|Pfam_DUF2375|Pfam_ARD
						scaffold-PKOX-2094825_Isoetes_tegetiformans	Cupin_1_3|Pfam_Cupin_1|Pfam_Cupin_2|Pfam_ARD|Pfam_CENP-C_C|Pfam_Cupin_6
						scaffold-PKOX-2000540_Isoetes_tegetiformans	Cupin_1_3|Pfam_Cupin_1|Pfam_HTH_23|Pfam_HTH_DeoR|Pfam_CENP-C_C|Pfam_HTH_29|deor2|Pfam_Cupin_2
						scaffold-PKOX-2000539_Isoetes_tegetiformans	Cupin_1_3|Pfam_Cupin_1|CPSase_L_D3_2|Pfam_CENP-C_C|Pfam_FSAP_sig_propep|Pfam_FeoC|Pfam_HTH_DeoR|deor2
						scaffold-PKOX-2012342_Isoetes_tegetiformans	Cupin_1_3|Pfam_Cupin_1|Pfam_Cupin_2|Pfam_Cupin_3|Pfam_Sigma70_r4|Pfam_ARD|Pfam_ENT|CPSase_L_D3_2
						scaffold-PKOX-2000538_Isoetes_tegetiformans	Cupin_1_3|Pfam_Cupin_1|Pfam_Cupin_2|Pfam_Cupin_6|Pfam_ARD|Pfam_CENP-C_C|CPSase_L_D3_2
						scaffold-PKOX-2000536_Isoetes_tegetiformans	Cupin_1_3|Pfam_Cupin_1|Pfam_Cupin_2|Pfam_ARD|Pfam_Cupin_6|Pfam_Cupin_3|Pfam_CENP-C_C|CPSase_L_D3_2|Pfam_AraC_binding
						scaffold-PKOX-2096033_Isoetes_tegetiformans	Cupin_1_3|Pfam_Cupin_1|Pfam_Cupin_2|Pfam_Cupin_3|Pfam_AraC_binding|Pfam_ARD|Pfam_tRNA_anti-codon
		Marchantiophyta	Marchantia polymorpha Strain: Tak-1	3197	-
			Marchantia papillata subsp. Grossibarba	1920708	-
			Conocephalum conicum	41839	-
		Jungermanniopsida	Odontoschisma prostratum	526359	-
			Bazzania trilobata	13808	1	scaffold-WZYK-2090643_Bazzania_trilobata	Cupin_1_3|Pfam_Cupin_1|Pfam_Cupin_2|Pfam_ARD|Pfam_Cupin_3
			Porella pinnata	56943	-
			Ptilidium ciliare	139839	-
			Barbilophozia barbata	209798	-
			Scapania nemorea	41848	1	scaffold-IRBN-2157621_Scapania_nemorosa	Cupin_1_3|Pfam_Cupin_1
			Metzgeria crassipilis	1408784	-
		Klebsormidiophyceae	Klebsormidium nitens Strain: NIES-2285	105231	-
		Charophyceae	Chara braunii Strain: S276	69332	-
		Anthocerotophyta (Hornworts)	Anthoceros angustus	48387	-
			Megaceros flagellaris	263821	3	scaffold-UCRN-2047887_Megaceros_flagellaris	Cupin_1_3|Pfam_Cupin_1|Pfam_Cupin_2|Pfam_Cupin_3|cnmp_10
						scaffold-UCRN-2048728_Megaceros_flagellaris	Cupin_1_3|Pfam_Cupin_1|Pfam_Cupin_2|Pfam_AraC_binding
						scaffold-UCRN-2047869_Megaceros_flagellaris	Cupin_1_3|Pfam_Cupin_1|Pfam_Cupin_2|Pfam_ARD|Pfam_tRNA_anti-codon
			Phaeoceros carolinianus	185665	2	scaffold-WCZB-2117027_Phaeoceros_carolinianus_gametophyte	Cupin_1_3|Pfam_Cupin_1|Pfam_Cupin_2|Pfam_Cupin_3|Pfam_ARD|Pfam_AraC_binding|Pfam_Urocanase_C
						scaffold-WCZB-2117285_Phaeoceros_carolinianus_gametophyte	Cupin_1_3|Pfam_Cupin_1|Pfam_Cupin_2|Pfam_ARD|Pfam_Cupin_3|Pfam_AraC_binding|Pfam_cNMP_binding
			Leiosporoceros dussii	263836	1	scaffold-ANON-2005094_Leiosporoceros_dussii_B	Cupin_1_3|Pfam_Cupin_1|Pfam_Cupin_2|Pfam_Cupin_3|Pfam_ARD|Pfam_DUF2291
		Zygnemophyceae	Spirogloea muscicola	2576442	-
			Penium margaritaceum	102169	-
			Mesotaenium endlicherianum	184485	-
		Chlorokybophyceae	Chlorokybus atmophyticus	3144	-
		Gnetopsida	Gnetum montanum	3381	-
			Welwitschia mirabilis	3377	1	scaffold-TOXE-2060900_Welwitschia_mirabilis	Cupin_1_3|Pfam_Cupin_1|Pfam_Cupin_2
		Pinopsida	Thuja plicata	3316	2	Thupl.29379660s0001.2.p	Cupin_1_3|Pfam_Cupin_1|Pfam_ARD
						Thupl.29379660s0001.1.p	Cupin_1_3|Pfam_Cupin_1|Pfam_ARD
			Amentotaxus argotaenia	25625	1	scaffold-IAJW-2014718_Amentotaxus_argotaenia	Pfam_Cupin_1|Cupin_1_3|Pfam_Cupin_2|Pfam_ARD|Pfam_AraC_binding|Pfam_L_biotic_typeA
			Abies lasiocarpa	34340	1	scaffold-VSRH-2052537_Abies_lasiocarpa	Cupin_1_3|Pfam_Cupin_1|Pfam_SKI|Pfam_Cupin_2
			Sciadopitys verticillata	28979	1	scaffold-YFZK-2043305_Sciadopitys_verticillata	Cupin_1_3|Pfam_Cupin_1|Pfam_Cupin_2|Pfam_Cupin_3|Pfam_ARD|Pfam_AraC_binding
		Cycadopsida	Cycas micholitzii	182486	1	scaffold-XZUY-2048154_Cycas_micholitzii	Cupin_1_3|Pfam_Cupin_1|Pfam_Cupin_2|Pfam_Cupin_3
			Stangeria eriopus	34343	1	scaffold-KAWQ-2047841_Stangeria_eriopus	Cupin_1_3|Pfam_Cupin_1
			Dioon edule	58033	1	scaffold-WLIC-2120263_Dioon_edule	Cupin_1_3|Pfam_Cupin_1|Pfam_Cupin_2|Pfam_Cupin_3|Pfam_ARD|Pfam_E1-E2_ATPase
		Polypodiopsida (ferns a &Horsetails)	Ceratopteris richardii	49495	28	KAH7301341.1	Cupin_1_3|Pfam_Cupin_1|Pfam_Cupin_2
						KAH7301339.1	Cupin_1_3|Pfam_Cupin_1|Pfam_Cupin_2|Pfam_ARD
						KAH7301340.1	Cupin_1_3|Pfam_Cupin_1|Pfam_Cupin_2|Pfam_ARD
						KAH7301338.1	Cupin_1_3|Pfam_Cupin_1|Pfam_Cupin_2|Pfam_ARD|Pfam_HOK_GEF
						KAH7293377.1	Cupin_1_3|Pfam_Cupin_1|Pfam_Cupin_2|CPSase_L_D3_2
						KAH7293376.1	Cupin_1_3|Pfam_Cupin_1|Pfam_Cupin_2|CPSase_L_D3_2
						KAH7404536.1	Cupin_1_3|Pfam_Cupin_1|Pfam_Cupin_2
						KAH7404535.1	Cupin_1_3|Pfam_Cupin_1|Pfam_Cupin_2|Pfam_PROL5-SMR
						KAH7414778.1	Cupin_1_3|Pfam_Cupin_1|Pfam_Cupin_2|Pfam_Cupin_3|Pfam_ARD|Pfam_VCBS|Lactamase_B_5a
						KAH6556790.1	Cupin_1_3|Pfam_Cupin_1|Pfam_Cupin_2|Pfam_Cupin_3|Pfam_VCBS|Lactamase_B_5a
						KAH6556786.1	Cupin_1_3|Pfam_Cupin_1|Pfam_Cupin_2|Pfam_Cupin_3|Pfam_ARD|Pfam_VCBS|Lactamase_B_5a
						KAH6556791.1	Cupin_1_3|Pfam_Cupin_1|Pfam_Cupin_2|Pfam_Cupin_3|Pfam_VCBS|Lactamase_B_5a
						KAH6556787.1	Cupin_1_3|Pfam_Cupin_1
						KAH6556793.1	Pfam_Cupin_1|Cupin_1_3|Pfam_ARD|Pfam_Cupin_2|Lactamase_B_5a
						KAH6556792.1	Cupin_1_3|Pfam_Cupin_1|Pfam_Cupin_2|Pfam_CAF-1_p150|Lactamase_B_5a
						KAH7414782.1	Pfam_Cupin_1|Cupin_1_3
						KAH7414779.1	Cupin_1_3|Pfam_Cupin_1|MltA_2
						KAH6555027.1	Cupin_1_3|Pfam_Cupin_1|MltA_2
						KAH6555026.1	Cupin_1_3|Pfam_Cupin_1|MltA_2
						KAH6555028.1	Cupin_1_3|Pfam_Cupin_1|MltA_2
						KAH6555024.1	Cupin_1_3|Pfam_Cupin_1|MltA_2
						KAH6556794.1	Cupin_1_3|Pfam_Cupin_1|Pfam_Cupin_2|Pfam_ARD|Pfam_Cupin_3|MltA_2
						KAH6556795.1	Cupin_1_3|Pfam_Cupin_1|Pfam_Cupin_2|Pfam_ARD|Pfam_Cupin_3|MltA_2
						KAH6556796.1	Cupin_1_3|Pfam_Cupin_1|Pfam_Cupin_2|Pfam_ARD|Pfam_Cupin_3|MltA_2
						KAH6556788.1	Cupin_1_3|Pfam_Cupin_1|Pfam_Cupin_2|Pfam_ARD|Pfam_Cupin_3|MltA_2
						KAH7435143.1	Cupin_1_3|Pfam_Cupin_1|Pfam_Cupin_2
						KAH7435142.1	Cupin_1_3|Pfam_Cupin_1|Pfam_Cupin_2|Pfam_Cupin_3
						KAH7435141.1	Cupin_1_3|Pfam_Cupin_1|Pfam_Cupin_2|Pfam_Cupin_3
			Psilotum nudum	3240	1	scaffold-QVMR-2056136_Psilotum_nudum	Cupin_1_3|Pfam_Cupin_1|Pfam_Cupin_2|Pfam_ARD
			Danaea nodosa	491836	-
			Sceptridium dissectum	93613	-
			Botrypus virginianus	167744	-
			Equisetum hyemale	3262	2	scaffold-JVSZ-2013449_Equisetum_hyemale	Cupin_1_3|Pfam_Cupin_1|Pfam_Cupin_2|Pfam_Cupin_3|Pfam_ARD|Pfam_AraC_binding|cupin_9|fimac2
						scaffold-JVSZ-2013448_Equisetum_hyemale	Cupin_1_3|Pfam_Cupin_1|Pfam_Cupin_2|Pfam_Cupin_3|Pfam_ARD|Pfam_AraC_binding|cupin_9|fimac2
			Culcita macrocarpa	361541	1	scaffold-PNZO-2150698_Culcita_macrocarpa	Cupin_1_3|Pfam_Cupin_1|Pfam_Cupin_2|Pfam_Cupin_3|Pfam_ARD
			Plagiogyria japonica	32161	2	scaffold-UWOD-2136135_Plagiogyria_japonica	Cupin_1_3|Pfam_Cupin_1|Pfam_HTH_Crp_2|Pfam_HTH_Tnp_4|Pfam_Cupin_2|eIF1neu4
						scaffold-UWOD-2128234_Plagiogyria_japonica	Cupin_1_3|Pfam_Cupin_1|Pfam_HTH_23|Pfam_DUF3622|CPSase_L_D3_2
			Plenasium javanicum	90695	1	scaffold-VIBO-2075327_Osmunda_javanica	Cupin_1_3|Pfam_Cupin_1|Pfam_Cupin_2|Pfam_Cupin_3|Pfam_tRNA_anti-codon
			Homalosorus pycnocarpos	86699	3	scaffold-OCZL-2010013_Homalosorus_pycnocarpos	Cupin_1_3|Pfam_Cupin_1|Pfam_Cupin_2|Pfam_Cupin_3|Pfam_ARD|Pfam_YscJ_FliF|eIF1neu4
						scaffold-OCZL-2006714_Homalosorus_pycnocarpos	Cupin_1_3|Pfam_Cupin_1|Pfam_YdaS_antitoxin|Pfam_HTH_Crp_2
						scaffold-OCZL-2006004_Homalosorus_pycnocarpos	Cupin_1_3|Pfam_Cupin_1|Pfam_Cupin_2|Pfam_Cupin_3
			Pilularia globulifera	49509	1	scaffold-KIIX-2089643_Pilularia_globulifera	Cupin_1_3|Pfam_Cupin_1|Pfam_Cupin_2|Pfam_Cupin_3|Pfam_ARD
			Anemia tomentosa	148559	4	scaffold-CQPW-2006794_Anemia_tomentosa	Cupin_1_3|Pfam_Cupin_1
						scaffold-CQPW-2006793_Anemia_tomentosa	Cupin_1_3|Pfam_Cupin_1
						scaffold-CQPW-2020251_Anemia_tomentosa	Pfam_Cupin_1|Cupin_1_3|Pfam_Cupin_2|Pfam_ARD
						scaffold-CQPW-2095660_Anemia_tomentosa	Pfam_Cupin_1|Cupin_1_3|Pfam_Cupin_2
	Angiospermae	ANA clade (early-diverging angiosperms)	Nymphaea colorata	210225	1	XP_031477907.1	Cupin_1_3|Pfam_Cupin_1|Pfam_Cupin_2|Lactamase_B_5a
			Amborella trichopoda	13333	1	U5D4Q8	Cupin_1_3|Pfam_Cupin_1|Pfam_Cupin_2
	Mesangiospermae	Magnoliopsida	Aristolochia fimbriata	158543	1	KAG9442472.1	Cupin_1_3|Pfam_Cupin_1|Pfam_Cupin_2|CorC_HlyC_2
			Cinnamomum micranthum f. kanehirae	337451	5	RWR92906.1	Cupin_1_3|Pfam_Cupin_1|Pfam_Cupin_2|Pfam_AraC_binding
						RWR86021.1	Cupin_1_3|Pfam_Cupin_1|Pfam_Cupin_2
						RWR81691.1	Cupin_1_3|Pfam_Cupin_1
						RWR81690.1	Cupin_1_3|Pfam_Cupin_1
						RWR81689.1	Cupin_1_3|Pfam_Cupin_1|Pfam_Cupin_2|Pfam_ARD|Pfam_AraC_binding
			Chimonanthus praecox	13419	-
			Magnolia officinalis	85864	-
		Eudicot	Arabidopsis thaliana Strain: cv. Columbia	3702	1	NP 180436.1	Cupin_1_3|Pfam_Cupin_1|Pfam_Cupin_2
			Chenopodium quinoa	63459	-
			Solanum lycopersicum	4081	3	CA03g08200	Cupin_1_3|Pfam_Cupin_1|Pfam_Cupin_2|Pfam_YjzC
						Solyc01g104100.2.1	Cupin_1_3|Pfam_Cupin_1|Pfam_Cupin_2
						XP_004229944.1	Cupin_1_3|Pfam_Cupin_1|Pfam_Cupin_2|Pfam_YjzC
			Solanum tuberosum	4113	3	XP_006349431.1	Cupin_1_3|Pfam_Cupin_1|Pfam_Cupin_2|Pfam_Cupin_3
						XP_006349432.1	Pfam_Cupin_1|Cupin_1_3|Pfam_Cupin_2
						XP_006339780.1	Pfam_Cupin_1|Cupin_1_3|Pfam_Cupin_2
			Coffea arabica	13443	3	XP_027106410.1	Cupin_1_3|Pfam_Cupin_1
						XP_027113140.1	Cupin_1_3|Pfam_Cupin_1
						XP_027087847.1	Cupin_1_3|Pfam_Cupin_1|Pfam_Cupin_2|Pfam_ARD
			Helianthus annuus	4232	3	XP_022028329.1	Cupin_1_3|Pfam_Cupin_1|Pfam_Cupin_2
						XP_022009337.1	Cupin_1_3|Pfam_Cupin_1|Pfam_Cupin_2|Pfam_Cupin_3
						XP_022028079.1	Cupin_1_3|Pfam_Cupin_1|Pfam_Cupin_2|Pfam_Cupin_3
			Eucalyptus grandis	71139	2	XP_039159116.1	Cupin_1_3|Pfam_Cupin_1|Pfam_Cupin_2|Pfam_ARD
						XP_010033169.2	Cupin_1_3|Pfam_Cupin_1|Pfam_Cupin_2|Pfam_ARD|BATS_2
			Vitis vinifera	29760	5	XP_002269304.1	Cupin_1_3|Pfam_Cupin_1|Pfam_Cupin_2|Pfam_ARD
						XP_002270155.1	Cupin_1_3|Pfam_Cupin_1|Pfam_Cupin_2|Pfam_tRNA_anti-codon|Pfam_DUF234
						XP_019079193.1	Cupin_1_3|Pfam_Cupin_1|Pfam_Cupin_2|Pfam_ARD
						XP_002269464.1	Cupin_1_3|Pfam_Cupin_1|Pfam_Cupin_2|Pfam_ARD
						XP_002269868.1	Cupin_1_3|Pfam_Cupin_1|Pfam_Cupin_2|Pfam_SH3_2|Pfam_ARD
			Cicer arietinum	3827	3	XP_004505897.1	Cupin_1_3|Pfam_Cupin_1|Pfam_Cupin_2|Pfam_Cupin_3|Pfam_ARD|Pfam_DUF4115
						XP_004504184.1	Cupin_1_3|Pfam_Cupin_1|Pfam_Cupin_2|Pfam_ARD
						XP_004504183.1	Cupin_1_3|Pfam_Cupin_1|Pfam_Cupin_2
			Fragaria vesca	57918	4	XP_004299935.1	Cupin_1_3|Pfam_Cupin_1|Pfam_Cupin_2
						XP_004294615.1	Cupin_1_3|Pfam_Cupin_1|Pfam_Cupin_2|Pfam_ARD|Pfam_Cupin_3
						XP_004292908.1	Cupin_1_3|Pfam_Cupin_1|Pfam_Cupin_2|Pfam_ARD
						XP_004294614.1	Cupin_1_3|Pfam_Cupin_1|Pfam_Cupin_2|Pfam_ARD
			Glycine max	3847	3	XP_003525010.1	Cupin_1_3|Pfam_Cupin_1|Pfam_Cupin_2|Pfam_Rotamase
						NP_001241132.1	Cupin_1_3|Pfam_Cupin_1|Pfam_Cupin_2|Pfam_ARD|Pfam_Rotamase
						XP_003538022.1	Cupin_1_3|Pfam_Cupin_1|Pfam_Cupin_2|Pfam_ARD
			Phaseolus vulgaris	3885	2	AGV54884.1	Cupin_1_3|Pfam_Cupin_1|Pfam_Cupin_2|Pfam_CMV_US
						XP_007159585.1	Cupin_1_3|Pfam_Cupin_1|Pfam_Cupin_2|Pfam_CMV_US|eIF1neu4|LY_2
			Carya illinoinensis	32201	3	XP_042982948.1	Cupin_1_3|Pfam_Cupin_1|Pfam_Cupin_2|Pfam_ARD|Pfam_DUF234
						XP_042980464.1	Cupin_1_3|Pfam_Cupin_1|Pfam_Cupin_2|Pfam_ARD
						XP_042958442.1	Cupin_1_3|Pfam_Cupin_1|Pfam_Cupin_2|Pfam_ARD
			Vigna unguiculata	3917	3	QCD84598.1	Cupin_1_3|Pfam_Cupin_1|Pfam_Cupin_2|eIF1neu4
						XP_027918178.1	Cupin_1_3|Pfam_Cupin_1|Pfam_Cupin_2|Pfam_Cupin_3|Pfam_Rotamase
						XP_027909020.1	Cupin_1_3|Pfam_Cupin_1|Pfam_Cupin_2|Pfam_ARD
			Manihot esculenta	3983	4	XP_021627075.1	Cupin_1_3|Pfam_Cupin_1|Pfam_Cupin_2|Pfam_ARD
						XP_021624850.1	Cupin_1_3|Pfam_Cupin_1|Pfam_Cupin_2
						XP_043817233.1	Cupin_1_3|Pfam_Cupin_1|Pfam_Cupin_2|Pfam_tRNA_anti-codon|Pfam_ARD
						XP_021627314.1	Cupin_1_3|Pfam_Cupin_1|Pfam_Cupin_2|Pfam_ARD
			Populus trichocarpa	3694	3	XP_002311378.1	Cupin_1_3|Pfam_Cupin_1|Pfam_Cupin_2|Pfam_ARD
						XP_006370285.1	Cupin_1_3|Pfam_Cupin_1|Pfam_Cupin_2
						XP_002310124.2	Cupin_1_3|Pfam_Cupin_1|Pfam_Cupin_2|Pfam_ARD|Pfam_Luteo_P1-P2
			Salix suchowensis	1278906	-
			Carica papaya	3649	2	XP_021891585.1	Cupin_1_3|Pfam_Cupin_1|Pfam_Cupin_2
						XP_021912575.1_	Cupin_1_3|Pfam_Cupin_1|Pfam_Cupin_2|Pfam_ARD|Pfam_Cupin_3
			Capsella rubella	81985	2	XP_006305197.1	Cupin_1_3|Pfam_Cupin_1|Pfam_Cupin_2|Pfam_Cupin_3|Pfam_ARD
						XP_006294419.2	Cupin_1_3|Pfam_Cupin_1|Pfam_Cupin_2|Pfam_Cupin_3|Pfam_ARD
			Brassica rapa	51351	-
			Crambe hispanica	70124	-
			Gossypium hirsutum	3635	9	XP_040946909.1	Pfam_Cupin_1|Cupin_1_3|Pfam_Cupin_2|Pfam_Phi-29_GP4|Pfam_Cupin_3
						XP_016755969.1	Cupin_1_3|Pfam_Cupin_1|Pfam_Cupin_2|Pfam_ARD
						XP_040960470.1	Pfam_Cupin_1|Cupin_1_3|Pfam_Cupin_2
						XP_016740592.1	Cupin_1_3|Pfam_Cupin_1|Pfam_Cupin_2|Pfam_ARD
						XP_016696798.2	Cupin_1_3|Pfam_Cupin_1|Pfam_ARD|Pfam_Cupin_2
						XP_016731990.1	Pfam_Cupin_1|Cupin_1_3|Pfam_Cupin_2|Pfam_Cupin_3
						XP_016728612.1	Pfam_Cupin_1|Cupin_1_3|Pfam_Cupin_2
						XP_040965056.1	Cupin_1_3|Pfam_Cupin_1|Pfam_Cupin_2|Pfam_ARD
						XP_016671242.1	Pfam_Cupin_1|Cupin_1_3|Pfam_Cupin_2|Pfam_Cupin_3|Pfam_ARD
			Citrus sinensis	85681	-
			Nicotiana attenuata Strain: cv. UT	49451	1	XP_019263019.1	Cupin_1_3|Pfam_Cupin_1|Pfam_Cupin_2|Pfam_ARD
			Cephalotus follicularis Strain: cv. St1	3775	-
			Erigeron canadensis	72917	4	XP_043611239.1	Cupin_1_3|Pfam_Cupin_1|Pfam_Cupin_2|LAG1_DNAbind_2|Pfam_ARD
						XP_043626534.1	Cupin_1_3|Pfam_Cupin_1|Pfam_Cupin_2|Pfam_Cupin_3
						XP_043631026.1	Cupin_1_3|Pfam_Cupin_1|Pfam_Cupin_2|Pfam_ARD|Pfam_IDH
						XP_043610503.1	Cupin_1_3|Pfam_Cupin_1|Pfam_Cupin_2|Pfam_ARD
			Rosa chinensis Strain: cv. Old Blush	74649	4	XP_024160354.1	Cupin_1_3|Pfam_Cupin_1|Pfam_Cupin_2|Pfam_ARD
						XP_024163396.1	Cupin_1_3|Pfam_Cupin_1|Pfam_Cupin_2|Pfam_ARD
						XP_024198507.1	Cupin_1_3|Pfam_Cupin_1|Pfam_Cupin_2|Pfam_ARD
						XP_024173977.1	Cupin_1_3|Pfam_Cupin_1|Pfam_Cupin_2
			Parasponia andersonii Strain: cv. WU1-14	3476	-
		Monocot	Oryza sativa	39947	4	XP_015641111.1	Cupin_1_3|Pfam_Cupin_1|Pfam_Cupin_2
						XP_015639453.1	Pfam_Cupin_1|Cupin_1_3|Pfam_Cupin_2|Pfam_Cupin_3|Pfam_ARD
						XP_015610995.1	Cupin_1_3|Pfam_Cupin_1|Pfam_Cupin_2|Pfam_Cupin_3
						XP_015611504.1	Cupin_1_3|Pfam_Cupin_1|Pfam_Cupin_2
			Brachypodium distachyon	15368	2	tr|I1HVU4|I1HVU4_BRADI	Cupin_1_3|Pfam_Cupin_1|Pfam_Cupin_2|Pfam_Cupin_3
						tr|I1HMD5|I1HMD5_BRADI	Cupin_1_3|Pfam_Cupin_1|Pfam_Cupin_2|Pfam_Ifi-6-16|Pfam_AraC_binding|Pfam_ARD
			Sorghum bicolor	4558	2	tr|C5WQC0|C5WQC0_SORBI	Cupin_1_3|Pfam_Cupin_1|Pfam_Cupin_2|Pfam_Cupin_3
						tr|C5YYX1|C5YYX1_SORBI	Cupin_1_3|Pfam_Cupin_1|Pfam_Cupin_2
			Zea mays	4577	8	NP 001105204.1	Cupin_1_3|Pfam_Cupin_1|Pfam_Cupin_2|Pfam_ARD|Pfam_Cupin_3
						tr|B6SLE7|B6SLE7_MAIZE	Cupin_1_3|Pfam_Cupin_1|Pfam_Cupin_2
						tr|A0A804QRK3|A0A804QRK3_MAIZE	Cupin_1_3|Pfam_Cupin_1|Pfam_Cupin_2
						tr|Q84TL7|Q84TL7_MAIZE	Cupin_1_3|Pfam_Cupin_1|Pfam_Cupin_2
						tr|Q84TL6|Q84TL6_MAIZE	Cupin_1_3|Pfam_Cupin_1|Pfam_Cupin_2|Pfam_AraC_binding
						tr|A0A804PTJ9|A0A804PTJ9_MAIZE	Cupin_1_3|Pfam_Cupin_1|Pfam_Cupin_2|Pfam_Cupin_3|Pfam_AraC_binding
						tr|A0A804PUB8|A0A804PUB8_MAIZE	Cupin_1_3|Pfam_Cupin_1
			Panicum hallii	1504633	1	tr|A0A2T7E7B5|A0A2T7E7B5_9POAL	Cupin_1_3|Pfam_Cupin_1|Pfam_Cupin_2
			Eragrostis curvula cv. Victoria	38414	2	tr|A0A5J9TF64|A0A5J9TF64_9POAL	Cupin_1_3|Pfam_Cupin_1|Pfam_Cupin_2|CDC48_2_2
						tr|A0A5J9U4X8|A0A5J9U4X8_9POAL	Cupin_1_3|Pfam_Cupin_1|Pfam_Cupin_2|Pfam_ARD
			Phoenix dactylifera	42345	1	tr|A0A8B7C9G8|A0A8B7C9G8_PHODC	Cupin_1_3|Pfam_Cupin_1|Pfam_Cupin_2
			Cocos nucifera	13894	1	KAG1339186.1	Cupin_1_3|Pfam_Cupin_1|Pfam_Cupin_2
			Elaeis guineensis	51953	1	XP_010920723.1	Cupin_1_3|Pfam_Cupin_1|Pfam_Cupin_2
			Zingiber officinale	94328	9	XP_042406508.1	Cupin_1_3|Pfam_Cupin_1|Pfam_Cupin_2
						XP_042403031.1	Cupin_1_3|Pfam_Cupin_1|Pfam_Cupin_2
						XP_042430913.1	Cupin_1_3|Pfam_Cupin_1|Pfam_Cupin_2|Pfam_ARD|Pfam_DHQS
						XP_042421834.1	Cupin_1_3|Pfam_Cupin_1|Pfam_Cupin_2|Pfam_ARD|Pfam_DHQS
						XP_042465159.1	Cupin_1_3|Pfam_Cupin_1|Pfam_Cupin_2|Pfam_ARD
						XP_042459699.1	Cupin_1_3|Pfam_Cupin_1|Pfam_Cupin_2|Pfam_ARD
						XP_042454540.1	Cupin_1_3|Pfam_Cupin_1|Pfam_Cupin_2
						XP_042415022.1	Pfam_Cupin_1|Cupin_1_3
						XP_042409863.1	Pfam_Cupin_1|Cupin_1_3|Pfam_Cupin_2
			Musa troglodytarum	320322	11	URE45204.1	Cupin_1_3|Pfam_Cupin_1|Pfam_Cupin_2
						URE47948.1	Pfam_Cupin_1|Cupin_1_3|Pfam_Cupin_2|Cpn10_2
						URE47949.1	Pfam_Cupin_1|Cupin_1_3|Pfam_Hydrolase_like|Pfam_Hydrolase_6|Pfam_Cupin_2|Pfam_HAD_2
						URE47950.1	Pfam_Cupin_1|Cupin_1_3|Pfam_Hydrolase_like|Pfam_Cupin_2|Pfam_Hydrolase_6
						URE47947.1	Pfam_Cupin_1|Cupin_1_3|Pfam_Hydrolase_6|Pfam_Hydrolase_like|Pfam_Cupin_2
						URE42159.1	Cupin_1_3|Pfam_Cupin_1|Pfam_DUF1635|Pfam_Hydrolase_like|Pfam_UPF0181|Pfam_HisKA_3|Pfam_YlqD
						URE42157.1	Cupin_1_3|Pfam_Cupin_1|Pfam_DUF1635|Pfam_Hydrolase_like|Pfam_tRNA_NucTransf2|Pfam_UPF0181|Pfam_HisKA_3|Pfam_YlqD
						URE42156.1	Cupin_1_3|Pfam_Cupin_1|Pfam_Hydrolase_like
						URE42158.1	Cupin_1_3|Pfam_Cupin_1|Pfam_DUF1635|Pfam_Hydrolase_like|Pfam_UPF0181|Pfam_HisKA_3|Pfam_YlqD
						URE42161.1	Cupin_1_3|Pfam_Cupin_1|Pfam_Hydrolase_like
						URE42160.1	Cupin_1_3|Pfam_Cupin_1|Pfam_DUF1635|Pfam_Hydrolase_like|Pfam_tRNA_NucTransf2|Pfam_UPF0181|Pfam_HisKA_3|Pfam_YlqD
			Lolium rigidum	89674	8	XP_047061618.1	Cupin_1_3|Pfam_Cupin_1|Pfam_Cupin_2
						XP_047061350.1	Cupin_1_3|Pfam_Cupin_1|Pfam_Cupin_2
						XP_047061363.1	Cupin_1_3|Pfam_Cupin_1|Pfam_Cupin_2
						XP_047061256.1	Cupin_1_3|Pfam_Cupin_1|Pfam_Cupin_2
						XP_047061184.1	Cupin_1_3|Pfam_Cupin_1|Pfam_Cupin_2
						XP_047095690.1	Cupin_1_3|Pfam_Cupin_1|Pfam_Cupin_2|Pfam_Cupin_3|Pfam_Ifi-6-16|Pfam_AraC_binding|Pfam_ARD
						XP_047065389.1	Cupin_1_3|Pfam_Cupin_1|Pfam_Cupin_2|Pfam_AraC_binding|Pfam_ARD
			Hordeum vulgare subsp. Vulgare	112509	7	XP_044973597.1	Cupin_1_3|Pfam_Cupin_1|Pfam_Cupin_2
						XP_044978673.1	Cupin_1_3|Pfam_Cupin_1|Pfam_Cupin_2|CDC48_2_2
						XP_044974256.1	Pfam_Cupin_1|Cupin_1_3
						XP_044946706.1	Cupin_1_3|Pfam_Cupin_1
						XP_044961530.1	Cupin_1_3|Pfam_Cupin_1|Pfam_Cupin_2|Pfam_Cupin_3|Pfam_AraC_binding
						XP_044961048.1	Cupin_1_3|Pfam_Cupin_1|Pfam_Cupin_2|Pfam_Cupin_3|Pfam_AraC_binding|Pfam_ARD
						XP_044984570.1	Cupin_1_3|Pfam_Cupin_1|Pfam_Cupin_2|Pfam_Cupin_3|Pfam_ARD|Pfam_AraC_binding|Pfam_Ifi-6-16
			Eleusine coracana subsp. Coracana	191504	4	GJN33679.1	Cupin_1_3|Pfam_Cupin_1|Pfam_Cupin_2
						GJM98492.1	Cupin_1_3|Pfam_Cupin_1|Pfam_Cupin_2
						GJN36274.1	Cupin_1_3|Pfam_Cupin_1|Pfam_Cupin_2|Pfam_AraC_binding|Pfam_ARD
						GJM94394.1	Cupin_1_3|Pfam_Cupin_1|Pfam_Cupin_2|Pfam_AraC_binding
			Digitaria exilis	1010633	2	KAF8730964.1	Cupin_1_3|Pfam_Cupin_1|Pfam_Cupin_2
						KAF8666858.1	Cupin_1_3|Pfam_Cupin_1|Pfam_Cupin_2
			Carex littledalei	544730	4	KAF3330990.1	Cupin_1_3|Pfam_Cupin_1
						KAF3322002.1	Cupin_1_3|Pfam_Cupin_1|Pfam_Cupin_2|Pfam_GPI
						KAF3341089.1	Cupin_1_3|Pfam_Cupin_1|Pfam_Cupin_2|Pfam_ARD|Pfam_Cupin_3|Pfam_GPI
						KAF3341072.1	Cupin_1_3|Pfam_Cupin_1|Pfam_Cupin_2|Pfam_GPI
