# Supplementary material for: Convergent evolution of hexenal isomerases in Lepidoptera and plants
Source: Nat Ecol Evol. 2026 Feb 27;10(4):807–19. doi: 10.1038/s41559-026-02999-2 (PMC13076199; doi:10.1038/s41559-026-02999-2)
Supplement: Supplementary file 6 — List of primers and reagents used in this study. [file 41559_2026_2999_MOESM6_ESM.xlsx]

## Sheet: Primers
Primers
Gene	Direction	Sequence 5' to 3'	description
Ubiquitin	forward	AAAGCCAAGATTCAAGATAAG	qPCR Manduca sexta housekeeping gene
Ubiquitin	reverse	TTGTAGTCGGATAGCGTGCG	qPCR Manduca sexta housekeeping gene
MsHi-like	forward	TTCCGTTTCCCTCCTGCTAC	qPCR MsHi-like
MsHi-like	reverse	GCCACTGTCGTTTTCGGGTC	qPCR MsHi-like
MsHi-1	forward	CTGGACAGCGACATGACAGT	qPCR MsHi-1
MsHi-1	reverse	CGCCATGGCATAGATGTTCG	qPCR MsHi-1
MsHi-2	forward	TTACGGTGACACGCAGTACC	qPCR MsHi-2
MsHi-2	reverse	GGTTCCGGGCGGGTAAAATA	qPCR MsHi-2
XP_030037989	forward	CAAGTTCGTGCCCTATGGGT	qPCR XP_030037989
XP_030037989	reverse	TCGGCATGACACTAGCATCC	qPCR XP_030037989
CvHi-1	forward	ACATCTACAACTGCTGCCGT	qPCR CvHi-1
CvHi-1	reverse	AATACGAGCGAGATGGCCTG	qPCR CvHi-1
PCG69794	forward	TGCGTCAAACCCACATCAGT	qPCR PCG69794
PCG69794	reverse	CAGACCTGTGGAGTTCGCTA	qPCR PCG69794
PCG65132	forward	AGACTGGCTGAAGATGGGAAC	qPCR PCG65132
PCG65132	reverse	TCTGCACTTGTTTTCGGGAGT	qPCR PCG65132
PCG76483	forward	TCCTGGCACCTTCAACTACC	qPCR PCG76483
PCG76483	reverse	TTGCGCCGTATAACCATCGT	qPCR PCG76483
PCG65227	forward	TCCCGGGGCTCTTTTCTCTA	qPCR PCG65227
PCG65227	reverse	CCTCCCAGCATTTTACCAGC	qPCR PCG65227
CvEif4a	forward	TCTGCCTACTAACCGTGAAAAC	qPCR Chloridea virescens housekeeping gene
CvEif4a	reverse	TCCGAGATGCTTGTATGGTAGA	qPCR Chloridea virescens housekeeping gene
BmHi-1	forward	GCCGGATCATTCAACAGTCC	qPCR BmHi-1
BmHi-1	reverse	CATTGTGGTCCTGCATTCCC	qPCR BmHi-1
XP_021209119	forward	TCGGTGCCTATAGAACGTCC	qPCR XP_021209119
XP_021209119	reverse	AAGGTAGGCTGCCCAAGAAT	qPCR XP_021209119
BmGAPDH	forward	CGCTGGAATTTCTTTGAATGAC	qPCR Bombyx mori housekeeping gene
BmGAPDH	reverse	CAATGACTCTGCTGGAATAACC	qPCR Bombyx mori housekeeping gene
DpHi-1	forward	GAGTCAACTTTGTTCCGTTGTG	qPCR DpHi-1
DpHi-1	reverse	CTCTCTACCTTCACCAGCTTTC	qPCR DpHi-1
DpEF1A	forward	TGTCGCTTTCGTACCCATTT	qPCR Danaus plexippus housekeeping gene
DpEF1A	reverse	CCTTCAGCCTTACCCTCTTTAC	qPCR Danaus plexippus housekeeping gene

## Sheet: Chemicals
Chemicals
Compounds	CAT#	Provider	Description
trans-2-hexen-1-al	132659	Sigma	E2AL
cis-3-hexen-1-ol	W256323	Sigma	Z3OL
cis-3-hexen-1-al	W256102	Sigma	Z3AL
trans-2-hexen-1-ol	W256218	Sigma	E2OL
Glutathione Sepharose® 4B	GE17-0756	Cytiva/Sigma
cOmplete™, EDTA-free Protease Inhibitor Cocktail	COEDTAF-RO	Roche
Phusion™ High-Fidelity DNA Polymerase	F-530	ThermoFisher
HOT FIREPol® EvaGreen® qPCR Mix Plus	08-04-00020	Solis Biodyne
RevertAid Reverse Transcriptase	EP0441	ThermoFisher
DreamTaq DNA Polymerase	EP0705	ThermoFisher
Wheatgerm	1661	Frontier Scientific Services Agriculture	Insect Artificial diet
Soy isolate	1510	Frontier Scientific Services Agriculture	Insect Artificial diet
Casein	1100	Frontier Scientific Services Agriculture	Insect Artificial diet
Ascorbic acid	6015	Frontier Scientific Services Agriculture	Insect Artificial diet
Vitamin mix, Fortification Lepidoptera	F8095	Frontier Scientific Services Agriculture	Insect Artificial diet
Sorbic acid	6967	Frontier Scientific Services Agriculture	Insect Artificial diet
Methylparaben	7685	Frontier Scientific Services Agriculture	Insect Artificial diet
MP Biomedicals Wesson Salt Mixture	11425672	Fisher Scientific	Insect Artificial diet
Cholesterol 95%	11480353	Fisher Scientific	Insect Artificial diet
Agar-Agar, Kobe I	5210.5	Carl Roth	Insect Artificial diet
One Shot™ BL21 Star™ (DE3)	C601003	Invitrogen
RNase-Free DNase I	79254	Qiagen
TURBO DNA-free™ Kit	AM1907	ThermoFisher
RNeasy Kits	74104	Qiagen
Bovine Serum Albumin	A7906	Sigma
Tryptone	T1332	Duchefa Biochemie
Yeast extract	Y1333	Duchefa Biochemie
NaCl	7647-14-5	VWR
lysosome	62971	Fluka
Triton X-100	9002-93-1	Sigma
Ampicillin	A0104	Duchefa Biochemie
Bacto Agar	9105960	Becton Dickinson
Anti-GST Antibody (B-14) HRP	sc-138 HRP	Santa Cruz Biotechnology
Tris	T1501	Duchefa Biochemie
HCl	1.00317.2500	Merck
P-coumaric acid	501-98-4	sigma
luminol	521-31-3	sigma
Hydrogen peroxide (H2O2) 30%	822287	Merck
TEMED	161-0800	Bio-Rad
Acrylamide:N,N′-Methylenebisacrylamide 37.5:1	017-090	Fluka
Ammonium persulfate (APS)	7727540	Sigma
Sodium dodecyl sulfate (SDS)	71725	Sigma
Ethanol	1.00983.1000	Supelco
Isopropanol	1.09634.2511	Merck
Tween 20	p2287	Sigma
glycerol	G1345	Duchefa Biochemie
TRIzol™ Reagent	15596018	ThermoFisher
Methanol	20846.3	VWR
Chloroform	102445	Merck
EDTA	E5134	Sigma
Agarose (for DNA Electrophoresis)	D000247	Sphaero Q
Precision Prestained Protein Standards	1610373	Bio-Rad
GeneRuler 1 kb Plus DNA Ladder	SM1331	ThermoFisher
Acetic acid	1.00063.2511	Merck
L-glutathion, reduced (GSH)	G4251	Sigma
IPTG	I1401	Duchefa Biochemie
1,4-Dithiothreitol (DTT)	3483-12-3	Sigma
Flavin adenine dinucleotide disodium salt hydrate	F8384	Sigma
